# Supplementary material for: Assessing acceptability of pre-exposure prophylaxis (PrEP) among participants in an HIV vaccine preparedness study in southwestern Uganda
Source: PLoS One. 2022 Jul 29;17(7):e0271104. doi: 10.1371/journal.pone.0271104 (PMC9337655; doi:10.1371/journal.pone.0271104)
Supplement: S1 File — (XLSX) [file pone.0271104.s001.xlsx]

## Sheet: IDIs
Demographics	Recent life history			HIV			PrEP					HIV Risk Perception		Acceptabilty to study procedures				HIV Vaccine
	Places lived	Work	Relationships	Mode of transmission	Prevention Measures	Perceptions	Knowledge About PrEP	Attitudes towards PrEP	Access to PrEP	Motivations to PrEP Uptake	Barriers to Uptake of PrEP	Most people at risk	Self-Risk Assessment	Study procedures	Likes, Dislikes & Recommendations	Reasons for Participation	Reasons for Non-Participation/Withdrawal	Knowledge about the study	Attitudes on an HIV Vaccine	Suggestions for dissemination	Questions
30 year old male	lived in district A, in south western Uganda, then in the capital returned to district A then moved to different districts including returning to the capital working as builder. He currently lives in district A	first vended vegetables for someone in district A, worked as mechanic in the capital then builder, boda rider and he is now back into building/construction	had a 'wife' with whom he has two children, they separated, he later got another and again separated after two children. He now has a girlfriend who visits	knew two modes of transmission; by blood from different people getting into contact e.g. Through sharing of sharp objects like razor blades, accidents, etc and also through unprotected sex	HIV testing with a new partner. Also mentioned male circumcision but he said one cannot entirely depend on it.	there are different types of HIV so one should protect oneself even after they get infected. Again, HIV is like bad luck because one may not get in cases you would expect them to and vice versa.	it is for guarding the body against HIV especially for people in multiple sexual relationships who do not want to use condoms	initially thought it was for the rich and the working class	Did not know where people accessed PrEP	the fact that it gives the body protection against HIV	felt there was nothing that could prevent one from taking PrEP now that it did not cause any problem to the body but just gave protection	thinks teenagers/youths especially the girls are the most at risk because they start sex early compared to boys.	feels at risk of HIV because he cannot live without sex, which together with money are the two necessities of life.	welcome at the reception and HIV testing	enjoys the procedures especially HIV testing as knowing status could help him live positively	he is motivated by the good care, the health care, the follow ups and by participating, it is reciprocal help because you help them conduct research to invent drugs	fear of being injected with a virus. "Some people fear that they may be injected with a virus in order to test the effectiveness of the drug/vaccine" [Pg5 Lin 11-12]		has no problem with the vaccine is already decided to participate. Although people react differently to drugs/vaccines, he thinks his blood is safe for the vaccine		None
24 year old male	He was born and grew up in district B, he later traveled to the capital but he came back home where he left to live in district A first with her patternal aunt before he moved out to rent at in a nearby town	He worked in the cattle trading business in his home area and left it after encountering losses due the ban by then. He moved to capital to work for a plastics company. He was not paid and he then joined mechanics	He said he had had many 'girls' that he could hardly remember the number. He currently sleep with more than 8 girls whom he doesn't consider as permanent girlfriends i.e. they just come and go	Sharing of sharp objects with an HIV positive person, having unprotected sex with an HIV positive person and accidents.	Abstainance, use of condoms, avoid sharing of sharp object, testing before sex and PrEp.	"if a woman have vaginal fluids may not infect a man during an intercourse" [Pg 2 Lin 19-20]	He says that if taken, PrEP can prevent one from HIV	He believes using PrEP will brand him a womaniser.	Participant do not differentiate Government hospital from a research organisaion where PrEP is distributed to the qualifying beneficiaries in district D. However he would wish to access PrEP from MRC since it is near and involve no transport costs.	The protection from HIV it gets. Some people need to receive something in order to do something; they may be take PrEP if given money. Getting information from people who have used PrEP will also motivate others	Side effects, transport costs, stigma and some people do not want to take medication when they are not sick.	He says youth (boys and girls) are the most at risk due to peer influence, love for money, drug abuse and the love for pleasure/fun. However, he says girls are most at risk for they are victims of early marriages and domestic violence that increases their chances of infection	Participant says he is not at risk; he tests for HIV before sex and uses condoms as a back up.	"At the first visit, you come and they welcome you, you sit and wait to go in for sessions/talks/counselling, after you go for blood testing, and after they ask you if you would wish to take condoms with you and then you leave. On the second visit, nothing much happens just giving more clarity on the vaccine yet to be introduced re-testing and receiving condoms" [Pg 5 Lin 23-29]	He likes the fact that they are reminded about their visits earlier which enable them to prepare. He is also looking forward to receive the vaccine so that he is protectected from HIV. He dislikes nothing.	People wish to know more about HIV prevention and certain life skills for example parenting, domestic violence bad peer influence, drug abuse and the dangers of having many sexual partners among others that are discussed in health talks.	Reasons for Non-Participation inluded; transport costs, fear for side effects, time spent at the clinic and failure to meet appointments. Withdrawals were attached to peer infuence and fear of side effects	"The study is intending to test an HIV vaccine; the persons receiving the vaccine will get protection form HIV however, it is the vaccine is not yet proven effective but still under research" [Pg 6 Lin 26-28]	He believes the vaccine will work like the vaccines and drugs that have been tested before and worked. However, acceptance will depend on the sensitization of communities and sharing of experiences by the volunteers. He is worried of the unseen side effects like birth deffects, body weakness and other sicknesses like continuous headache.	He says that money minded individuals and business people may not have time foe dissemination meetings. However, he suggests the use of volunteers to pass on the messages because communities will trust their words more.	Do you (MRC) test other sicknesses other than HIV like Typhoid, measles etc?
44 year old male	He was born and grew up from district E but he later relocated to district J but life got hard economically and he had to relocate back to his home area In 2014 he came to a fishing comunity on lake victoria and he moves to several landing sites looking for silver	He grew up as a farmer but he later relocated to the FC 2014 and started fishing (silverfish).	He got married in 1993 and gave birth to seven children; two died and remained with five. In 2009, they separated after the woman becoming adulterous. He has just re-married in March this year (2018) and she is now pregnant.	"Having unprotected sex, sharing sharp objects like needles and razorblades and having accidents with HIV negative persons. Mother-to-child transmission and through blood transfusion" [Pg2 Lin 29-31]	Testing before sex, Use of a condom and circumcision. However he says he never uses a condom and he doesnot test with his partners nor wife to know their statuses before having sex.	"We were told that if one is on ART they do not transmit HIV; this gave me confidence to even sleep with people I know are on ART". He has never tested with his 35year old wife believing that she may not lie about being negative given her age.	He has heard about PrEp from a counsellor at MRC Masaka though he says he is has no information about the dosage		He only knows that PrEP is found somewhere in Rakai district.	Knowing that PrEP can prevent them from HIV	fear of side effects	Alcohol addicts and drug abusers; both men and women that do things unknowingly under the influence of alcohol and marijuana hence engaging in risky behaviours. People always in discotheques and beaches; men/youth fall trap of the many beautiful women found in these districts not knowing that they are all positive. However, youth are more at risk. he also says that fishing is a high risky job for…	He says he is at risk because he is always looking forward to sleep with a beautiful woman given having money.	"When we reach; we go for VCT, receives treatment in case one has any other sickness and then we receive transport and leave" [Pg 4 Lin 9-10]	Sometimes the transport is not enough most especially when participants change location.	Routine HIV testing and transport refund	I have heard rumours that we are going to be injected with the HIV virus and some people say that you sell our blood abroad" [Pg 4 Line 28-29]. Others are affected by tight work schedules.	"The research is about knowing our HIV status; for starters they were to inject us with a drug to engineer the manufacturing of antibodies in our bodies but it later changed to a vaccine that will be administered to volunteers who would have remained negative until next year" [Pg 5 Lin 1-4]	He is worried about the side effects on to their bodies; like death and mental disorders and that the vaccine may be so strong. he believes the vaccine will control the spread of HIV since there will not be new sero converters He says more peolple already wish to join and be part of the cohort but they do not know where to start.	Participant thinks that people would wish to hear from their friends who have used the vaccine (volunteers). To tell them about the safety and the effectiveness of the vaccine.	I have flue and cough, skin problems and I am having hearing problems. Can I get help here?
31 year old male	He went to the capital to live with his brother in 2004 up to 2006. He then started renting for two years until he left Kampala in 2008 to a fishing Island and in 2012, he came to the landing site in district A up to date.	2006, he started working in a company in the capital where he left in 2008 for the Island to learn fishing. In 2012, he moved and started fishing silverfish up to date.	He got a girlfriend (school girl) and she got pregnant 1n 2008. He ran away from the capital and went to the islands . He married again n 2013 and had two children, however they separated early 2018 and the woman got another man.	"Having unprotected sex especially rough sex leading to wounds with HIV positive people. Sharing of sharp objects like needles and razorblades" [Pg 2 Line 6-7]	couple testing before sex, use of condoms and avoiding use of alcohol and drugs. He says alcohol affect condom use and women do not ask men to put on condoms	Hiv leads to loss of hair, eyesight and continuous diarrhoea	He has heard about PrEp from counsellors at MRC clinic. That PrEP prevents HIV and it's taken on a daily basis until one feels is nolonger at risk.		"We were told that organisation xxxx is giving out PrEP in the risky areas of lace D like and it’s neighbouring landing sites" [Pg 2 Line 22-23]	Many people love to have sex yet they prefer not to use condoms; these will benefit so much from PrEP	fear of side effects and the daily pill burden	People leaving at landinding sites especially women who fell victim of men who dislike condoms after giving in their money for sex. School going children who sleep with infected persons without condoms because of their urge for sex.	He admits to be at risk since he does sleep with different nice women untested. As if it a demon demanding to him to do so.	"At the start; they called us and asked us some questions, collected our contact information, filled some forms (consent) to show that we had accepted to participate in the study without being coursed or forced, then we tested HIV and left" [Pg 3 Lin 25-28]	He wants to be part of the HIV prevention struggle. He dislikes nothing.	The need for information especially about the HIV prevention struggle and the "little" money given to them.	the long distances to the clinic which are costly and time consuming	"The study is all about prevention/elimination of HIV, they test us to monitor our HIV status and when the vaccine is ready they will test it on us" [Pg 4 Lin 12-14]	He says they are much eager to receive the vaccine and be saved from the pill burden. He believes many peolple will accept it, he is however worried about the side effects that might come with the vaccine.	He believes that people will continue welcoming the vaccine after witnessing the successful users (volunteers) of the vaccine. He says people should be told the advantages of the vaccine like stopping HIV and the ARV pill burden.
26 year old male	He grew up with his mother about 20 kilometres away from the capital on the Tanzania highway. When he was about 17 years old he went to the capital to live with his sister. He then left the capital in 2014 and came to the landing site in District A	He dropped out of school in primary six; in 2009 he got a job in a biscuit company that was constructing a new factory. As time went on work decreased as the construction was done. In Lambu he joined a friend on his stall and learnt making chapattis. He later realised he was not making a good earning and he joined fishing silverfish in 2016.	He says he has had one girlfriend in 2017 but they never spent a lot of time in touch (together). Whenever he feels a need of someone to have sex with, he just go and pay a sex worker. He says it is very hard to have a woman of own in the FC i.e. they are all shared among the many men	"Having sex with an HIV positive person with wounds around the private parts exposes one to a risk of contracting HIV. Kissing an HIV positive with wounds around the lips. The risk of contracting increases when someone not circumcised sleeps with an HIV positive woman"	Testing before sex, Use of a condom and circumcision, and treatment of wounds around the private parts	Someone can never be the same with HIV; HIV cause weight loss, stigma, lose of forcus and goals thinking of death all the time.	He has heard about PrEp from counsellors at MRC Masaka. That PrEP prevents HIV and it's taken on a daily basis like the current ARVs		In place/district D	Many people love to have sex yet they prefer not to use condoms and circumcision	Adherence to the daily pill.	Men who never want to know their HIV status that they will be stigmatised. Men also want to the sexual difference between women . Fishermen are also at risk for their no ownership and HIV testing especially in bars	He admits to be at risk since he has no permanent woman; girls especially inbars donot accept VCT fearing t lose clients hence infecting the men	"They fast tested us and then sent us here (at The MRC clinic), they re-tested and the found us negative, and they gave us appointments to return" [Pg 4 Lin 30-32]	He likes the routine testing and follow up. However, there was too much delays at the first visit and all his friends were complaigning but he says this changed on the next visits	Routine HIV testing and the free medical care given	Some do not want to test and travellers like fishermen cannot fulfil their appointments.	"The study is about stopping HIV; this is being done by preparing a group of HIV negative people who will be injected with a vaccine when time is ready in 2019" [Pg 4 Lin 15-17]	The vaccine may come with side effects however, he thinks the vaccine will control HIV especially when there no new HIV infections.	He believes that people will welcome the vaccine after witnessing the successful users (volunteers) of the vaccine. They will also want to try it out.
35 year old male	He was about 17 years when his paternal uncle took me to the capital After around five years he then went to Lake vitria islands to live with his father. About 4 years ago, He left and came to a landing site in district A	He started working as a porter on construction sites for about a year until he learnt building and then he started working independently for almost five years until He could not earn enough. He then went to the islands and started fishing. After the start of the operations to stop poor fishing methods, fishing became hard and unproductive. He then came to the FC and started agriculture, and some …	When in the islands, he married a woman and got one child with her. Fishing became hard and unproductive and he could not earn enough money to run my family, the wife left with the child and she started running a grocery stall. Since then, he has married like three women and have gotten one child with the current wife. However, he say he doesnot socialise a lot and has a few friends.	Blood bonding, mother-to-child transmission and accidents	Use of condoms and circumcision especially for other sexually transmitted diseases.	HIV is deadly especially when not protected against and it is mainly transmitted through having unprotected sex with a positive person. "I have my saying that the more you have long rounds during sex with the woman, the more the chances of infecting you with HIV. I just have sex briefly and finish before she ‘dries' up’'	He has heard about PrEp from counsellors at MRC Masaka that MRC is going to research about PrEP	PrEP may leave people infected, sickly, lost body energy and sexual manpower. "It would not be taken daily because we do not have sex every day; in our community, people will think we are taking ARVs. At least if it was a monthly injection" [Pg 2 Lin 25-27]	The counsellor told him where to access PrEP at he moment however he did not remember the place. However, he says he would wish to access PrEP at government the health facility in the community because it is very near and it does not involve transport expenses.			He says Sex workers are more at risk because men donot accept use of a condom and Women only fear pregnancy other than HIV. In addition, men continuously rape women and infect them with HIV.	"I am at risk because the prevention measures I have told that I use are not enough. Most of us do not go to clinics to test for HIV; we instead wait for organisations like MRC. I have gone to a clinic once in my life and it was a woman that forced me. When I get a woman, she just start her marriage duties until organisations comes for VCT"	"MRC field workers came to our community and called us here (at the clinic), we were three and the counsellor gave us papers [consents] and explained to us the details. We then went for testing and after we were given appointments for our next visits" [Pg 3 Lin 30-33]	He likes it that unlike the previous studies/outreaches they are now coming to the clinic where they learn a lot of new things. He dislikes nothing.	Some people are motivated by the transport given to them while other people are motivated after seeing other people benefiting from the research studies.	"Lack of time to dedicate to the schedules, procedures and appointments. Some people are travellers for example fishermen" [Pg Lin 9-10]		"I cannot say much about the vaccine because we do not know about its side effects; maybe it can cause diarrhoea, cancer, loss of energy and 'manpower'." [Pg 4 Lin 15-17]		Will the vaccine be for sale?
21 year old male	I left school when I was 16 years after completing primary five. In 2014, I left home where I used to live with my mother in the western region of the country and came to the landing site in district A. In 2017, I transferred to another nearby FC	On reaching the landing site in 2014, I started fetching water for money for around a month and then joined fishing (silver fish) up to date.	After dropping out of school, I got a girlfriend and she gave to birth to two children but they both died at birth, I had to get another girlfriend with whom I had two children who (the children) are currently living with my mother. Later in April 2018, I got a woman and married. We now have one child.	Having unprotected sex with an infected partner, people with STIs and wounds around their private parts are at risk, Sharing of sharp objects with an HIV infected person, accidents and mother-to-child transmission	Putting on a condom especially with people whose status are not known, ART as treatment, Prevention of mother-to-child transmission, HIV testing, avoiding sex with suspected HIV positive women, and avoid drug abuse. "Some does while others fear the “knife”. [Pg 2 Lin 12]		He was told about PrEP at MRC that it reduces on the chances of being infected		According to him, he was told that PrEP is not available at the station, and areferral form was to be given to him to access PrEP from a certain hospital that he did not remember its name.	He said that people living ih high risky areas will be motivated to take PrEP, in addition, he would also take PrEP if he could access it from a nearby centre	The long distances and high transport costs to access PrEP, some fear tablets while other people no longer fear HIV.	Sex workers and people who work and stay in bars because they do not decide whether to put on condoms, and men who go on sleeping around with other women	He said he is at risk since he could not trust the wife whose whereabouts he is not sure of.	They met me in Lambu, tested me and when I they found me negative, they gave me a paper and later called me here (at MRC). We had several counselling sessions, signed documents [consent], re-tested and they gave me an appointment. [Pg 3 Lin 20-23]	He liked the continuous Hiv health education that has helped him change behavior	The desire to protect personal lives from diseases.	He said that some people are always busy to spare time to visit the clinic while others most especially women are restricted by their partners not to leave home.	According to him, the study is about testing an HIV vaccine	However, we need the vaccine so that we can stop worrying about HIV. [Pg 3 Lin 30] According to him, the vaccine will reduce since there will be no new infections		Is the vaccine ready? Will the vaccine be given to the positive or to the negative people?
20 year old Male	I left school in 2016 after completing primary six; I went to the capital but I later came back home in district C early 2017 and in April 2018 I went to the FC in district A	On going to the capital in 2016 i learnt hair cutting (barber). However, my boss did not treat me well in that he wanted too much money on a daily basis that I could not make from the salon. I left in 2017 and later stated fishing (silver fish) in April 2018 up to date.	I had one girlfriend in the capital but we separated when I came back home; I now have one girlfriend in the FC	Having unprotected sex with persons having wounds around their private parts hence leading to contact with infected blood. Sharing of sharp objects with an HIV positive person	Use of a condom, abstinence and Male circumcision	You can die when you catch HIV but you take longer to die. You are always sickly and worried; you become skinny and always miserable. [Pg 2 Lin 28-29]	Initially he said not to have heard about PrEP but after the explanation, he said to have heard about such a drug though he did not know it was PrEP. He added that he heard that the drug could prevent someone from getting HIV	He said that some people who will see him taking PrEP may think he is on ARVs hence stigma	He would wish to acces PrEP from organisations like MRC because they are easily accessed	Knowing that PrEP can prevent them from getting HIV. He added that people who dislike tablets will be much motivated If PrEP was in a different form like an injection other.		According to him men are the most at risk because they dislike condoms although women asks them to. The participant believes that positive women sometimes want to spare the men from HIV but men are stubborn to put on condoms.	He said that he is not at risk because he consistently use condoms.	We met in Lambu, tested for HIV and we were sent to Masaka (MRC). We came, tested and they explained to us about the study i.e. about testing an HIV vaccine on HIV negative persons. We currently come and test and then being given the next appointments. [Pg 3 Lin 3-6]	he likes routine HIV testing	she said that some people want to receive the vaccine while others are motivated by the transport allowances they receive whenever they visit the clinic.	Mistrust in the vaccine, lack of information, and stigma (thinking that all volunteers are positive)	The study is about testing an HIV vaccine and some people/volunteers will participate in testing the vaccine	He believed the vaccine could help to control HIV and he he had no worries.	He would convince the friend by telling him the effectiveness of the vaccine so that he would make him accept VCT to start the vaccine.	Is the vaccine ready?
31 year old male	I left home in 1998 after dropping out of school, I went to the capital and started renting to work. in 2013, I came back to to live in different locations in District A. In 2016, I went to the FC and in November last year (2018) i moved to the islands of Lake Victoria	After dropping out of school in senior two; I went to the capital and joined hawking for five years. After that period, things started going unwell; arrests and grabbing of our merchandise hence loss of all my capital. I then joined building in 2003 upto date.	After moving to the FC in 2016, I got married in 2017. however, before getting married, I had like seven girlfriends but I dropped all of them after getting married.	Un protected sex with HIV positive persons, sharing of sharp objects and mother-to-child tramsmission	Testing to know your HIV status, use of a condom, avoid sharing of sharp objects and male circumcision reduce on the chances of infection. [Pg 1 Lin 39-40]. He added that in his community some men give excuses like abdominal pain not to use condoms. Some men were circumcised	According to him, HIV is very dangerous because it has no cure.	Counsellors told me that it could prevent HIV if it is used as directed by a physician i.e. every day before having sex but not after sex.		He was told that PrEP is in district D at a certain health facility though he could not tell the name of the health facility.	The love to prevent from HIV	Poor adherence due to laziness and reluctance plus alcohol use	The uncircumcised men and people who use drugs like alcohol and people with sexually transmitted infections/disease [Pg 2 Lin 20-21]	He said he is at risk for he has no vaccine to prevent him from HIV. Although he claimed to sleep with only his wife, he could not trust her behaviors that might put him at risk.	They met me in Lambu, tested me and sent me hear. When I came, they took me through a counselling session, tested me and gave me a next appointment. [Pg 3 Lin 9-11]	He liked everything and according to him, that is why he always spare the time to come for his appointments. He was looking forward to receiving the vaccin	Knowing my HIV status and updated information about HIV prevention. The need to reduce on the HIV scourge also influences participation	Lack of interest and reluctance in attending sensitization meetings/gatherings.	The study is about fighting HIV by introducing an HIV drug [Pg 3 Lin 25]	He was positive that the vaccine will help to prevent new infections and giving people a peace of mind. he added that he was not worried of side effects saying that death is natural.	He said he will tell the friend about the study and receive his reactions then he will respond to his responses accordingly.
23 year old male	lived in district G where he was born and grew up before moving to district A	did farming after school, and later electrical engineering	has a long time girl friend, a university student, also involves with casual partners	through unprotected sex with an HIV-infected individual, blood contact during accidents, sharing sharp objects, mother to child transmission	condom use, faithfulness and couple HIV testing, male cirmuscision but this is not 100% effective			it is good, especially in discordant relationships but might have issues with adherence now that it is a daily drug	should be availed in clinics within their communities to ease access		long distances to PrEP facilities	students, young couples	thinks he is at risk because women are always tempting them	The first time; we came and they explained to us about the study and the procedures, tested, signed consents, collected locator information and given date for the next appointment. He however added that he is named HIV positive each time he visits the clinic	All is well unlike the first visit that took us a lot of time on the clinic. I like it when I test periodically; I am now confident about my status and it motivates me to live safely.	the medical treatment and information from counsellors and clinicians about HIV and prevention.	fear for drugs/vaccines' side effects	We were told that they are going to test an HIV vaccine; the vaccine have been tested on animals and it is going to be tested on HIV negative humans persons to test its effectiveness and impact on human body. [Pg 4 Lin 30-32]	he believed that the vaccine will be accepted if its effective. And he believed that people will accept the vaccine as they have accepted PrEP. He was however worried about side effects.		a) Why are you doing research? b) They told me we are many volunteers but I am always alone, why? c) Do you give the care and treatment to everyone? d) Won’t the vaccine have adverse side effects?
22 year old Female	was born in district C south west of the capital and lived with mother's friend in the capital while in upper primary. After completing S.4 in district A, in south western Uganda, she worked in different areas in the capital. She moved and lived in district A before going back to live around the capital	first worked at a restaurant and in a supermarket in the capital. Worked as a mobile money operator in district A before working on current job of mobile money operator in the capital	first boyfriend moved out of country and lost contact. She had another partner with whom they had a daughter aged one and half but separated because of beatings in addition to being financially unsupportive. She currently has a partner but the relationship is not serious. does not hope to enter into serious relationships	unprotected sex with a partner of unknown HIV status, sharing sharp instruments with an HIV-infected person, from mother to child, contact with HIV-infected blood	taking an HIV test once you get new partner or using condoms, avoid sharing sharp instruments, Voluntary HIV testing, use of male/female condoms and PrEP		it is a pill in form of ARVs taken daily to prevent an individual from contracting HIV in case they had sex with an HIV-infected person. Got this information from health workers (HWs) who came to Kasensero fishing community and then again HWs who came to Nyendo community and also heard it again here at the clinic		said PrEP could be accessed at the MRC clinic	one may dislike using condoms and instead decide to take PrEP	fear of daily pill taking, size of the pill and fear that it is too big and will clog in the throat, fear of side effects, fear that it might cause them HIV now that is in the form of ARVs and distrust of the drug.	unmarried young girls 16-27 or even 30 years as these start sex early and young men because they do not like using condoms, sex workers and mad people (women) for the latter get raped	considered herself at risk of HIV because she is within the age bracket of youths at risk (16-27 or even 30)	received at the reception with a cup of tea, enters a room where she is asked questions, is tested for HIV, goes through questions again, sees a doctor/clinician if she has any health issue who prescribes drugs, gets drugs at the pharmacy, then back to the clinician for chit indicating amount of money to be refunded in transport, then to payment dest where she receives the money and leave.	the fact that they do not give a results slip after testing for HIV and they do not explain why they conduct pregnancy tests. Again, she sometimes delays here and lunch time finds her but they do not provide lunch. She feels that they should give enough information about the study so that she can also clearly explain it. likes the fact that they are given a warm welcome, they are given tea with e…	some join because of PrEP and want to try out this new thing, others are motivated by free medical care for other infections like STIs	long distances whereby they spend a lot of money on transport, others refuse claiming the pills (PrEP) is for killing people, HIV infection, busy and fail to get time, are employed and get no time off	did not have knowledge now that it was not yet out	fears the side effects and thinks people will accept the vaccine if the side effects are minimal. Thinks it is better than pills (PrEP) or condoms because unlike the above, you take it once until it expires. (pg.7 lin 27-32)	has not used the vaccine yet so as to testify about it	when is the vaccine study starting? How long does PrEP stay in the body? How much PrEP does a person take? Does one take it (PrEP) here or do they go with it and take it at home?
40 year old Female	She said she has always lived in her current community though she has lived in different parts of the community.	She was initially working from home, she would weave mats and sell later started washing people’s clothes moving to different houses. until she started her dobby business from her little savings.	The participant has 4 children though; 2 boys and two girls who are aged 23, 20, 17 and 13 respectively. She had these four children with 3 other men; she had her first born with one partner, then the second born with another partner and the last two were from the same partner. She lives with a partner whom she referred to as ‘friend’ now that they are not officially married. They have lived toge…	She stressed unprotected sex as the major mode of HIV transmission and that blood transfussion, MTCT and injections are minimal. She mentioned ART as prevention.	Use of condoms and treatment of wounds and bruises arround the private parts. She adds that men do not want to go in for testing and circumcision.	"Another thing which I could confidently say now that I have been through it is that there are some blood groups which does not easily spread or contract HIV. I do not even have a count of how many people I have had unprotected sex with who died of HIV but I am negative. Some died long back and the people (carnivores) who ate them are now lacking sauce" [Pg 2 Lin 33-37]	She has heard about PrEp from MRC counsellors.	she believes she needs PrEP because she is sexually active with a sex urge to satisy	she says she hasn't heard PrEP available anywhere apart from MRC. She would also prefer to access PrEP from MRC Masaka.	Knowing that PrEP can prevent her from HIV	Adherence to the daily pill maybe difficult for example for travellers and alchol users. She gave an example of people who forget their ART drugs in the clothes they bring her for washing and do not even come back to inquire.	She says that people (men and women) in the age group that is still sexually active, plus sex workers. She said that all categories of men pays for sex including boda boda riders, the married and the rich.	She agrees to being at risk because she can not say no to aman since she has urge for sex to satsfy and she fears that the man may change his mind if asked to protect.	‘Whenever I come here, they test me for HIV and they have tested me twice since I started. They conduct a pregnancy test, they give me counselling and also ask me questions including obtaining my locator address" [Pg 5 Lin 3-5]	She likes the free family planning services and condoms given to them. She also trusts the vein/blood sample taken from them to give conclusive results unlike the fingerpricks done in the communities. She suggests Cervical cancer screening to be part of the tests they receive at the clinic.		Delays at the clinic,fear testing for HIV, Ignorance and personal reasons. She disagrees that patners especially refuse their wives from participating.	"Were told that we will be tested for HIV 3 times and only those people who are HIV negative will join the study, but that will happen in 2019. The vaccine will be first be tested to know if it works" [Pg 6 Lin 14-16] she added that they were told that one is free not to join the study or to withdraw from the study or to continue with the study.	She is so hopeful that the vaccine will protect her from HIV. She is however worried if the vaccine will have side effects like the current ARVs though she is ready to participate for the good of the future benefficiaries of the trial results	She says she first tells her neighbors about the works of MRC and its intentions to prevent HIV however, she tells them that the vaccine is for both the negative and the positive HIV patients not to leave them disappointed.	What happens if they test me those 3 times and I am HIV negative; will they give me an HIV infected man so as to know that the vaccine really works?
22 year old Female	She was born in 1996 in the villages of district A, along the Uganda-Tanzania highway. She has one sibling from her mother and two from her father. She studied up to senior four and a course in hair dressing in the same area still but did not complete the course due to lack of money.	Although she did not complete/perfect the course, she learned hair relaxing and plaiting but she lacks capital to start up a salon. She left the salon (where she trained) last year and moved to a surburb in the capital where she is selling fried snacks on top of a retail shop	She got pregnant while working in the salon and after she delivered, a friend with whom she went to school with invited her to the claiming she should not sit (rot) in village. She now has a partner with whom they meet once in a while but since he does not support her wholly, she is not so much into him and claims she gave up on relationships and is abstaining from sex with other men.	Sex, sharing of sharp objects and mother-to-child tramsmission	Avoid sharing of sharp objects, PMTCT and using condoms. She added male circumcision though acoording to her, it does not give much protection except protection on other STDs like syphilis but not HIV		She said she heard about it here (at the clinic), that you can take pills if you are HIV negative and they protect you from contracting HIV. She said, though she seemed not very sure about whether these pills are taken on a daily basis.	She said she thought only negatively about PrEP and she said she couldnot start it if she is not HIV positive. She was also worried of the consquences of leaving PrEP after being initiated.	she did not know anywhere since she was not interested in PrEP.	She said that PrEP is mainly needed by those people who cannot avoid sex and she gave an example of men.		According to her, women were the most at risk due to their love for money.	She said she was not at risk and she does not even expect to ever be because she can avoid situations that put her at risk. she added that she is cautious and cannot have sex with a partner whose HIV status she does not know. In addition, she always wait for 3 months to elapse and they retest to confirm that he is HIV negative before she has sex with him. On top of that, she uses condoms to preve…	She said that on arrival, she is welcomed at the reception, then take off her blood sample for tests. after she recieves her transport and leave. However she did not know what tests that are being done because she never received results. She was again not aware whether an HIV test is conducted as she knew that HIV tests are conducted using a finger prick. she wanted to know the tests being done a…	She said she was happy with the transport refund. She added that even the way they were handled motivated her to come back because they (staff) were very caring.	Some people are motivated by the care provided to them by the health workers and making it clear that participation is voluntary.	According to her, some people fear to be used as research subjects for fear of complications. She added that volunteers hving 'issues' or misunderstandings with health workers can also lead to withdrawal	‘They are going to test an HIV vaccine to see whether it works or not’ [Pg 4 Lin 7]	She said she first heard about the vaccine at MRC. She went back home and discussed it with her aunt and the aunt said they had ever tested it on her, but for her it was a TB drug. She said that after discussing about it with her aunt, the fear reduced a bit but still, the blood differs and each one could react differently.	She said she could ask them to come and get information and take a decision after getting the information but she cannot decide for them.	What happens if they use that vaccine on me and I get problems; do they give me care or they just leave me?
26 year old Female	She was born in one of the fishing communities (FCs) in District A and she moved to a nearby FC to live with the partner	was working as a lodge attendant which she did for 3 years but she currently does not have a job	reported currently having two sexual partners but reported ever engaging in paid sex/sex work	unprotected sex, blood contact through accidents & sharing of sharp instruments, marital unfaithfullness	couple HIV testing & condom use with extra marital partners		she first heard about it at the MRC	since she was hearing about it for the first time, she needs time to think about before deciding to take it. She however thought that she probably had HIV and they wanted her to start ART but did not want to scare her	there are PrEP facilities where MRC staff can refer you	said could not say anything about this now that she was still studying PrEP. ‘I will not answer that because I also first gave it time to think about it, so, I cannot say that such and such people or which people need it’.	if it tastes bitter	Fishermen, because they have a lot of money at their disposal & sexworkers because they loved money a lot, reported seeing them (SW) sero convert within two months of staying in the fishing community	felt at risk now that she had two partners one of whom she did not know his HIV status. she however contradicted self and denied risk claiming she has tactics of protecting self e.g. does not let man touch around genital area during sex	tea at reception, gives blood & urine sample for HIV & pregnancy testing, sees doctor, goes to pharmacy, transport refund at reception and leaves	liked all of them and that is what kept her coming	‘They treat me well because if they did not, I would not be coming’.	partner refusal, sero converting; ‘Some people may sero convert along the way and they fail to return because of this. I had a friend who was here but went to a wrong place (was exposed to risk) and worried about coming back. It was after another NGO came into the area and she tested and was HIV negative. Good enough, the MRC study were still following her with phone calls and so after learning s…	‘They are testing a drug but they will select people to participate in the drug testing, not all people will participate’. She added that some people did not understand the study though	it is something she would want to be part of. However, some did not understand the vaccine and ask questions like; why do they test the vaccine on people who are HIV negative? Why don’t they give the vaccine to pregnant women? Others cannot read and did not read the information sheet		why do they test the vaccine on people who are HIV negative? Why don’t they give the vaccine to pregnant women?
30 year old Female	She has a home in Ditrict A but works in a nearby district and that is where she spends most of the time. She only comes to home to rest, when she is not working	First worked as a house maid but later ran a retail shop the time she was married and joined sex work after the marriage failed	Was in 'marriage' for 7 years. She now has sexual clients only	unprotected sex, sharing sharp instruments and from mother to child	condom use & PrEP		‘ they say that once you take it (PrEP), you cannot contract HIV even if you have sex with a man who is HIV-infected, but I have not personally believed it yet’.	does not believe that PrEP works for she only used it for 11 days instead of the 21 that it started being effective	accessed it at TASO Masaka but they had initially told her that she could access it at an NGO in District D She is happy because TASO is near compared to the NGO	‘now that I am exposed to many HIV risks, I was attracted by the fact that it could help protect me from contracting it’. ‘For instance, if the sexual client is infected and I am not, I could remain protected from getting it.’	she stopped due to side effects including nausea, hallucinations and big size of the pill making it hard to swallow. Others also fear to start because of side effects especially now that they are negative.	sex workers, fisherfolk & married people now that they do not use condoms	is at risk because of the kind of work she is involved in	tea at reception, HIV testing, questions, reporting health issues and prescription of medicines, pharmacy, reimbursement	free medical treatment and counselling/advice on how to remain HIV negative	she was attracted by PrEP	laziness and wasting time at the clinic, relocation to far away places, transport costs to the clinc	‘the study is about pills that prevent HIV (PrEP) but they told us that they will also introduce an injection for HIV prevention (vaccine) this year’	‘they will like it more than the pills for you would rather give me an injection than having to swallow these daily pills’.	‘I would tell them about this injection that prevents HIV now that they have refused the pill claiming it is hard to swallow’.
18 year old female	after she left District C where she had married shortly, she lived in different parts of the Capital where she worked as housemaid. She thereafter lived in district c and then to the area landing site	worked as house maid in the capital later started up a business of selling cooked eggs, which failed, survived on support from her boyfriend	had a partner before moving to the capital with whom they have a child, also had a partner while in the capital, and currently has a partner whom she said is a student in boarding school	sex with a partner of unknown HIV status, sharing sharp objects, from mother to child	HIV testing, condom use, PrEP		I heard that there are pills/tablets that you can take to prevent you from catching HIV. These pills are taken every day and if you do not take them every day, you may not have the protection. First heard about PrEP at some clinic in her natal village but she did not know where it could be accessed.	people like sex workers could take PrEP but she did not need PrEP herself because she is always protecting herself with ways like couple testing and condom use	was told about a place where you could access it but she had forgotten	condom fatigue and one decides to switch to PrEP and the cost of HIV	has other ways of protecting self. She does not like taking whichever drugs. As for other people, some do not like daily pilling taking. Again if they miss, they will get infected anyway	sex workers and people who do not test for HIV	is not at risk because she knows the HIV status of her partners, they are negative	tea, questions, HIV testing, sometimes pharmacy, transport refund	likes the time compesation and even the good care. Feels that all procedures are good and nothing should be changed.	knowing that it will benefit them in future	busy work schedules, travelling long distances to the clinic, relocating to far away places, being away from their community or family, failure to get someone to leave the children, travelling (being away at time of visit), failing to locate clinic	they were told (by MRC staff) that they were going to give people HIV treatment including counselling and pills.	it is good as some people may not like PrEP. She would like it herself because it is given once and that is it. However, some people just fear injections and be it treating other infections, they fear being pricked.	would tell people about this injection (vaccine) and the pills (PrEP) that prevent HIV. They would then choose which to use according to each one's preference.
37 year old female	after she left her natal home in District C, she lived in the capital before travelling a neigboring country in the north. She returned and lived in different districts near the capital and now in district H	Has been all along involved in sex work as she claimed that all the other work failed.	was once in a cohabiting relationship where she mothered 3 children and gave up serious relationships since then. Living a single life has helped her remain HIV negative. She now has sexual clients and they use condoms	unprotected sex, accidents and sharing of sharp instruments like razor blades and safety pins, from mother to child through breastfeeding or at birth	condoms, PrEP		it is a pill that prevented one from contracting HIV even if they had sex with an HIV infected individual. first heard about it at MRC but then later, some health workers came into her community testing and giving PrEP which she also got but kept to first see what it did to others who took it. It gave them side effects including diarrhea and skin rash and they ended up throwing the drugs in the t…	she had a feeling that PrEP was under trial and felt that only people who is not in their rightful thinking could swallow that drug. She said she can only swallow it after seeing people taking comfortably. The fact that it is swallowed everyday also scares her. added that people did not like prep for sure, they wonder why they should swallow now when still healthy yet there is that time when they…	she had at first gotten PrEP in Mulago but after joining the study, they referred her to TASO but she did not find staff when she went there. Feels that travelling that far will not be possible now that she relocated. Wanted a referral to a nearby prep facility	given the kind of work she is involved in (sex work), she feels she will have protection on prep now that a condom could break	the fact that it is swallowed every day scares her because people may think you are HIV-infected, the big size of the pill also makes it hard to swallow. She had also started before joining study but left it after taking for 15 days due to side effects like restlessness, heart palpitations, thirst, feeling sleepy. in addition, she was discouraged by her friends	sex workers, she felt that much as they used condoms, they somethings fell into temptations of high paying clients	feels at risk though she consistently uses condoms, she said a condom could break	wellcome and tea at the reception, take blood sample for HIV testing, STI testing, counselling and heath talks, drug prescription and dispensing, transport refund and she leaves. On the first visit however, she was given information and they obtained her consent	hates the little money given as transport and time compesation and at times wishes she had stayed home and did work that earned her money. However, she likes the procedures because if not, she would not have travelled that far to come for clinic visits	desire for good health	the regular pricks and blood draws and some think they are making money out of it, lack of time, relocating to far away places		‘Most people will accept it because you get it once and that is it. Even with these family planning pills, women find them hard to take (bubagayaaza okumira) and they end up getting pregnant yet if it is an injection, they take it’. Had no fears about the vaccine but other people did, they say that the whites want to infect us with HIV like they did in Congo. she however feels that uptake will be…
35 year old female	Has lived on different landing sites on Lake victoria in District A	initially sold barbacoa, then cooked food but was losing money and so resorted to roastin maize or selling jack fruit, supplements this with income from sex work	she is not in any serious relationship and only has casual & sexual clients. she is now tired of this kind of life and would like to get a serious partner and settle	through unprotected sex especially in case of dry/rough sex or if one has sores in their genital area, through accidents &sharing of sharp instruments	prep but she cannot take it. She applies her own methods like washing after sex, etc to avoid HIV. Sometimes uses condoms, or scrutinising the partner to ascertain they look healthy	there are some blood groups that do not catch HIV. For her case, many of her partners and clients have died of HIV/AIDS but she is negative	Drug that one could swallow to prevent them from contracting HIV even if they got exposure to HIV. first heard about it at MRC but shortly later, health workers brought it to their community and she got the pills though she waited to see how others reacted to the drug	it could still be under trial and she feels she will not take it before seeing people who have taken it comfortably. Added she had doubts about prep	knew prep was not available but there was a place where it could be accessed		taking TASO drugs and at the same time claiming she was HIV negative would appear like she was boasting towards her HIV-infected friends and would make them feel bad. Again, she distrusted prep for she felt it was still under trial and not fit to be swallowed. There are other ways through which she can avoid HIV	all people, it is not only the fisherfolk as it		starts with tea/soda, goes through questions, HIV testing, gets drugs in case of any health issues, transport refund plus 10,000 shilling	disliked family planning much as she had not mentioned it in the procedures. She said people get a lot of complications from family planning. She likes the fact that she handle her well	desire to learn new things/get new information	people are just reluctant, others think they are already infected and see no use in participating; they do not believe their HIV negative status however much they tell them		they were going to introduce a drug that prevents HIV. She feels some people will accept it while others will refuse. She said she liked it herself given the fact that she involved with many men	she would tell them to go in for it as it would protect them from HIV even if they had sex with an HIV-infected man.
36 year old female	from her natal home, she lived with a partner in district D for 3 years, then in District A town, then back to district D before she moved to live in in a FC in district A	first worked as house help, then as shopkeeper, then as waitress in a hotel in Lambu and she now sells cooked food especially to fishermen.	she currently has a parter but they do not stay together, he lives in District C town	through sex and sharing of sharp instruments. She after prompting mentioned mother to child transmission	couple HIV testing and use of condom if one is infected, there is also a pill you can take to prevent HIV (prep)		knows that there is this pill that prevents one from contracting HIV. first heard about it from people in her community but did not believe it as she could not think there is a drug that could prevent HIV. Believed it after hearing it again at MRC. She knew that it is a pill that is swallowed but did not have more information than that.	liked it but did not like the place of access (TASO) and was waiting for it to get here so as to start. Felt that all people, especially the women needed PrEP regardless of category	knows that it could be accessed at TASO but does not like going there, she is waiting for it to reach MRC	if they (prep providers) could provide transport, people would find it easy to go for prep refills	did not know why people did not take up PrEP	all people, uncircumcised men, people who do not test for HIV yet they do not use condoms	does not feel at risk for she cannot have sex with a partner whose status she does not know	warm welcome at the reception plus tea and soda, HIV testing, questions, then transport refund and leaves	liked the good handling and care they gave her and there is nothing she disliked	she came purposely to get medical treatment for a health condition but on reaching here, she liked what she was taken through and so decided to continue coming	does not know why people do not participate yet they express desire when she tells them about the study; ‘they envy me when I share with them about the study’.		feels it is something good and will protect them from HIV if it is got. Feels she will participate in the trial when it starts. Expects to live longer with a vaccine	she would tell friends that there is this drug that could prevent one from contracting HIV and that it is good
22 year old female	she was born on 16th April 1996 near the Uganda-Tanzania border. She lived in the vilages of the nearby district for 1 and half years and returned home.	She got a job as waitress in a restaurant in in a small town neighbouring her natal village and worked there for 6 months. From there, she worked in another restaurant in a Isingiro district in the west for 2 months. While here, she got friends who attracted her to work in a bar and she worked in a bar for some months. She then moved to district D and worked in xxxx bar for 1 year and from there …	She was forcefully taken for marriage at the age of 14 and the man took her to the village in district D where she lived for like 1 ½ years and left the marriage. The man would always beat her until she decided to walk all the way back to her natal home. she had a boyfriend who lived in the capital. They related for 3 years, they would visit each other over the weekends or she would visit him in …	through sex work while others get it through contact with infected blood e.g. accident, sharing sharp objects	prep, PEP, Male circumcision, condoms	swallowing 5 panadol tablets before sex. That you cannot contract HIV or even pregnancies.	she said she first heard about it from the officer in charge of police of her area. before coming here and then heard it again here (at the clinic) [she however mixed PrEP with PEP]	she said that most people say that it is good but they imagine how they could move with pill containers yet they are not HIV-infected! ‘At least if it were an injection that would have been easier because you get it once.	according to her, PrEP was accessed at MRC	she said that the packaging should be different from that of ARVs. In that case, even if another person saw it, they will not suspect that you are taking HIV drugs.		sex/bar workers, young girls (25 yrs and below) especially in-school because they involve with older men yet they do not use condoms, uncircumcised men who rely on this and do not use condoms	she said she was not because she knows her HIV status and also knows how to protect herself. She added that she first asks her partners to go for an HIV test and then another test after 3 months to confirm that he is really negative. In addition to that, she tells them to use condoms because she does not want pregnancies.	First takes tea, Talks to the counsellor who gives her condoms now that she does not use contraceptives, Gets her transport refund	the people are very welcoming and even at the reception, the lady there is very happy and welcoming.	They are very welcoming in that they motivate you to come back	She feared that they were going to infect them. Others think that they are going to make them surrogate mothers for those Americans who did not have children. ‘They are going to inject us with semen’.	she said that it is about an HIV vaccine. They told them about the pills (PrEP) but most of them said they could not manage the pills and instead opted for the injection to prevent HIV.	she said that she fears it because they said one should be on family planning. Why should she use family planning yet she has ever used it before and it gave her serious problems! I asked if she discussed it with the care providers/study staff and she said she did and they told her about other family planning methods other than the injection/pills. ‘Unless it is first proven that it will match my…	she would tell them that if we want our children to live a good life, we should participate in research for a cure. In that way, you will have put a brick on this struggle to end HIV/AIDS.	what will happen after the research, what next?

## Sheet: FGDs
FGD Category	HIV			PrEP						HIV Risk Perception	Acceptabilty to study procedures				HIV Vaccine
	Mode of transmission	Prevention Measures	Perceptions	Knowledge About PrEP	Attitudes towards PrEP	PrEP Disclosure	Access to PrEP	Motivations to PrEP Uptake	Barriers to Uptake of PrEP	Most people at risk	Study procedures	Likes, Dislikes & Recommendations	Reasons for Participation	Reasons for Non-Participation/Withdrawal	Knowledge about the study	Attitudes on an HIV Vaccine	Suggestions for dissemination	Questions
Young women (18-24 years)	Sharing of sharp objects especially in private health facilities, un protected sex, kissing, mother-to-child transmission, and accidents	condoms, testing before having sex especially with people with of unknown status, PrEP, PEP, circumcision. Participants expressed issues about condom use saying that they smell, men leave them inside women, allergies, some burst, and preferences of expensive brands to frree condoms.	one participant believed that Mother-to-child transmission of HIV is recklessness of healthworkers since according to her, transmission is at birth.	They said that PrEP is a pill taken everyday to prevent from HIV. One of the participants reported to have one male friend taking PrEP, she however suspected that there maybe quite a number of people taking PrEP privately as it’s the case with condoms where people buy them in hiding.	Some respondent said that she can never take a daily pill since she is not infected. One participant never believed a pill could prevent HIV. Participants believed that one needed to begin PrEP after testing negative however, mistrusts in tests done using finger pricks also delay starting PrEP they said.	All the respondents agreed that disclosure to a partner is very helpful to avoidmisunderstandings when the partner finds out and to enable them seek for more information. Participants also suggested that health workers should inform their male partners about their PrEP taking to avoid misunderstandings.	Participants said that PrEP is not available at MRC but they are instead referred to nearby ART facilities (Uganda cares) hence stigma as people think they are up for ART. They added that 'Uganda cares' started taking PrEP down to Lambu in April 2019. However, P3 had no information about the availability of PrEP in the community. Participants preferred to get PrEP from MRC and facilities in the c…	They said that unlike ARVs, one can have a pill break especially when he/she is not engaging in risky behaviors at that moment. One participant had a male friend taking PrEP in discrete and she belived many follow suit. She suggested that men neede more information about PrEP and prevention to also stop harassing women using prevention.	Stigma since PrEP looks like ART, P3 had no information about the availability of PrEP in the community, lack of transport to PrEP facilities, side effects, the dislike for tablets that hinders adherence. Participants expressed that some people do not trust some testing services i.e. finger pricks; this also stops people from starting PrEP. More ensitization was suggested to make people trust in …	Married women, alcoholics, and sexworkers	“they welcome us with tea/a bottle of soda, after we go for HIV testing while receiving counselling and given a chance to ask any question of concern as we wait for the results. P3 however said that they no longer receive counselling as it used to be. She said that they test and answer a series of questions after which they receive treatment for any sicknesses as expressed by the volunteer" [Pg 5…	participants were concerned with the much amount of blood collected from them and thrown away. All the respondents unanimously expressed the need to know why family planning seems so important in the study. Some questions asked at the clinic make them feel shy. they however liked the routine HIV testing		lack of information of the different services, tight work schedule, HIV information fatigue, transfers and relocations, plus taking drugs when one is not infected.	According to the participants, study is about testing an HIV vaccine that is to be introduced in the near future	Participants was positive about the vaccine; it would save them from the daily pill. One participant was however concerned that the vaccine was to be taken together with PrEP although other participants lacked information about that. Participants were worried about side effects although some were willing to participate if side effects are short term since they fear to catch HIV		Why is family planning so important in the study?
Young men (18-24 years)	Accidents, sharing sharp objects, unprotected sex, mother to child transmission.	Avoiding sharing of sharp objects, using condoms during sex with a person of an unknown HIV status, using PrEP, testing for HIV with partner to know their status before you could have sex, avoiding multiple sexual partners and remaining faithful to one partner	one participant reported that having unprotected sex leads to HIV regardless of the status of the partner	According to them; PrEP is taken by people at risk on a daily basis at a the same time of the day. they also had knowledge that PrEP does not prevent other STDs. One participant however thought that there was an option of injectable PrEP and he opted for it.	Participants expressed the need for PrEP by saying that other preventive measures are hard to use especially to some who drink alcohol plus multiple partners. One said claimed to get goosebumps if use condoms.	Majority of the respondents agreed that it's important to disclose to the partner and one said that the partner would be happy knowing that she is safe. However one participaant said that pills create mistrust among partners and he preferred alternative prevention measures. a participant who took PrEP in a school holiday complaigned that the packaging was the same as of ART	They got PrEP at Taso and RHSP however, many suggested that PrEP be accessed from clinics (private) in the nearby communities as it is with condoms; to avoid stigma and transport clinics	One participant who had used PrEP and stopped said that he felt at risk and he could not easily access condoms when needed. Participants believed that weekly or monthly PrEP would motivate more people like men, putting PrEP at community private clinics, and establishing facilities run by MRC staff.	Stigma attached to TASO; participants suggested that PrEP be brought at MRC. Pill burden, the packaging of PrEP which more the same as ART, adherence issues especially to travellers, and stigma in families; participants preferred an injection so that it's administered occassionally.	sex workers, alcohol, Fisherfolk. One participant felt at risk since he was not using condoms. He decided to take PrEP until he returned to school and he dropped off as he felt less at risk	We get health talks, they ask us questions and we receive counselling on how to stay safe, Medical treatment in case one is sick, HIV testing, they provide us with condoms, They even refund transport	Participants like the routine HIV testing that motivates them to prevent from HIV.	HIV testing, condoms, transport rtefund and time allowances. Participant referred to it as a double benefit i.e. HIV prevention and allowances.	telling participants to inform health worker before withdrawal scare them that they may be hurt in the process. In addition Distrust of PrEP also would scare away participants; they suggested more information on PrEP	Participant knew that the study is to test an HIV vaccine on HIV negative individuals.	Some participants were worried that the vaccine would increase promiscous behaviors, cause them cancer or kill them. They believed that the vaccine will be used unlike the daily condom use though some people dislike injections. others however believed were to use the vaccine after seeing others use it.	Participants wanted to first participate in the trial to provide trial information to the rest. Others wanted to see others first participate	How long will the study take? Does PrEP only prevent HIV? Does PrEP affect you if you stop it as is the case with ART? The health worker said am free not to take PrEP; how is it? Can I swallow PrEP after exposure to risk? For example, I could be having them (the drugs) in my cupboard. If you swallow PrEP and have sex immediately, does it work?
