# Supplementary material for: Assessing acceptability of pre-exposure prophylaxis (PrEP) among participants in an HIV vaccine preparedness study in southwestern Uganda
Source: PLoS One. 2022 Jul 29;17(7):e0271104. doi: 10.1371/journal.pone.0271104 (PMC9337655; doi:10.1371/journal.pone.0271104)
Supplement: S2 File — (XLSX) [file pone.0271104.s002.xlsx]

## Sheet: IDIs
Demographics		Recent life history		PrEP								HIV Risk Perception	Acceptabilty to study procedures			HIV Vaccine
	Places lived	Work	Relationships	Knowledge About PrEP	Attitudes towards PrEP	Experiences of PrEP	Access to PrEP	Motivations to PrEP Uptake	Barriers to Uptake of PrEP	Disclosure of PrEP uptake	Motivation of men to take PrEP	Self-Risk Assessment	Likes, Dislikes & Recommendations	Disclosure of study participation	Reasons for Non-Participation/Withdrawal	Knowledge about the vaccine trial	Participation in the trial	Attitudes towards an HIV Vaccine	Disclosure of participation.	Suggestions for dissemination	Experience of vaccines.	Questions
30 year old male	He has not changed location but now stays with his wife in the surbubs of town A, but he sometimes stay at his parents' who lives nearby.	During the last interview, he was a builder but in February this year (2019), he started boda boda riding since his building work is seasonal and he never wanted to lay idle.	he was re-united with the mother of his two children of whom they had separated during the previous interview. He reported that he recently got a young beautiful girl of about 18yrs who infected him with an STD which he realised was syphillis after visiting the MRC clinic to get treatment. He added that young girls are the ones who are more infected with diseases these days. In addition, the girl…	He has learnt from MRC counsellors that PrEP is a daily pill taken to prevent HIV forexample during accidents. He added that PrEP is suitable for the youth and boda boda men because they live recklessly.	He had a positive attitude towards PrEP however he said that he could not move with pills wherever he would be going due to the fact that he sometimes does not go back home for days.	He had not heard of anyone on PrEP in his community nor any organisation giving out PrEP in the communities.	He said he is hoping to get PrEP from MRC because it is where he knows that PrEP is available.	“PrEP would be so easy if it was in form of an injection that is given after a given period of time for example a week or month because we sometimes we forget to take the daily drugs" [Pg 3 Lin 13-15]	he said that apart from people who think negatively about everyting, its only lack of interest that could stop one from taking PrEP, he added that the size of the pill could not stop anyone since people has taken bigger pills (ART) before.	he says that his wife needs to know about his uptake to avoid questions in the future and to be sure that is safe. According to him, older women like his wife love him and he receives a lot of hand outs like love, food, and money for his time (sex).	According to him, men needs more and continuous sensitization because they lack information and sufficient knowledge about different health services.	he is at risk because the ladies/girls they less expect to be positive are the most infected.	he likes the routine HIV testing because he can know when he seroconvert and start ART early	His friends had seen his study documents and pretended that they wanted to join but they never come to the MRC clinic. He is okay telling other people and he believes that their reaction could not stop him from participating from the study.	he want to protect his life against circumstances that he can have control over like HIV as opposed to accidents that he cannot have control over them. nothing could stop him from participating from the study maybe if he is going a broad but he said that is not possible since he did not go to school and he cannot go back to Kisoro (the home origin of his father)		He was willing to participate in the trial and he was not thinking about any side effects.	he is not thinking about any side effects. He said that other people have misconceptions (negative thinking) about everything for example some people think that they will be first exposed to the virus before they receive the vaccine. He however believed that people would accept the vaccine if they get to know about it, for example from the volunteers who can explain to them and that they can easi…	His wife knew about his participation and she was okay with it.	He believed that communities will trust volunteers giving them information after using the vaccine. However, he added that himself had stopped talking to friends about the vaccine because they were just diverting him with scares.	he had ever received tetanus vaccines during his previous motorcycle accidents and he never received any complication or side effects
24 year old male	"I now stay at my own home that I constructed in district B. I however come to A when my trainers need some help at my former work place and when am in A, I sleep in my rented house that I maintained”	“I changed my work place and I now work in district B at my friend’s garage because there was more work in district B compared to A. I however come to A when my trainers need some help at my former work place"	he said that the number of partners in his life were just increasing, he believed that this could be to the fact that he was financially improving (he owned two boda boda bringing in money daily) and girls were trying to earn from him. He reported to have more than six usual partners with whom he had sex with. he said to use condoms he receives from the clinic especially on new girls he doesnot t…	The volunteer lacked enough knowledge about what PrEP really was thinking that it is taken once a month instead of being taken on a daily basis. He said that he had only been told about PrEP on his first visit to the clinic. He learnt everything from MRC	He said that the daily pill for a long period is as not easy to adhere to as if he is taking ART. He added that all his friends never believed that any drug could prevent HIV, and they believed that PrEP will be percieved for ART. However, he added that he is hoping to get PrEP from MRC because it is where he learnt everything about PrEP from and the organisation (study team) knows everything abo…	He had not heard of anyone on PrEP in his community nor any organisation giving out PrEP in the communities.	he knew that PrEP could be accessed in ‘Rakai’ and Mulago ( Regional Referral Hospital) at TASO. However, the participant still confused RHSP with Rakai hospital as it was during the previous interview. He also thought TASO was part of Masaka Regional Referral Hospital. He said that he would love to get PrEP from the community at government centres because it save time and money and in addition d…	Counselling, sensitization and giving enough information about the service i.e. accessibility, importance and challenges (side effects). This will enable people take informed decisions. Seeing other people taking PrEP successful.	high transport costs to the centres, lack of enough information, the daily pill burden.	According to him; sharing should be among the volunteers for they understand the drug, but other people like unclose friends and colleagues might stigmatise him for an HIV patient. However, he believed that family members like wife, siblings and close friends needs to know since they might also need PrEP at one point.	he said that women should receive sufficient information to talk to their men/husbands about PrEP because they are always working hard to attend to such services.	he said that he was at risk because there at times when he can hardly get condoms before sex. He confesed to have played risky condomless se recently but they later tested with the girl and she was not infected.	He was okay with the study procedures as well as the health workers. He liked the continuous risk reduction counselling and HIV prevention methods. However, the travel time to and from the clinic plus the time spent on the clinic almost total to a day which would rather be used to do other work. He was suggesting if the team could meet him at his area of residence.	he said that he told his mother and she was so scared that the study intention is to kill the volunteer before having children. However, this change his decision of participation. However, he said that he would tell other people about the study but he knew they would not agree because he had already told quite a number of them and one friend once saw his visit card and he concluded that he was on…	The volunteer wanted to participate in the trial so that in case the vaccine is approved, other people can benefit from the vaccine	He knew that the vaccine is still under trial and that it would be given as an injection every after 3 or 6 months	he was looking forward to the vaccine to participate in the trial.	he was looking forward to the vaccine to participate in the trial so that in case the vaccine is approved, other people can benefit from the vaccine. he had fears that the vaccine may make him sick since he has never received any injection before apart from phlobetomy. the participant also thought that the vaccine will prevent them from having children during the time of use. He was scared of los…	He said that his wife might be scared knowing that he is participating that he may be of harm for example having sex, in addition she may also think I he is HIV positive. However he believed he could explain to the wife and can conduct an HIV test to prove to her so that she can be contented.	He believed that dissemination will be very easy after the trial; as volunteers testify to the communities after using the vaccine and having seen it effective.	He said to never gotten any chance to participate in any vaccine trial.
44 year old male	He had moved to another fishing community since January 2019 and he had no hopes of coming back to former fishing community but instead he expected to travel to another fishing community because that is where they projected a big catch of silverfish in the nearby future. He added, that In addition, it would be better if one got some money and leave for the ‘village’; there is a lot of ‘enjoyment’…	his work was still fishing, he complained about the hikened cost of living in fishing communities and how the poor are to leave for the villages and leave for the rich.	His wife stayed at X landing site and he usually comes back to his wife for two days twice a month especially during the ‘full moon’ because there is minimal fishing during that season. He was okay if the wife gets other men, after all he himself slept with other women including married women. According to him, women are meant to protect their husband’s property at home for example in the absence…	He knew that PrEP was taken on a daily basis. he said that all HIV negative individuals needs PrEP because they could be exposed at any time. However added people leaving in fishing communities and ones leaving in recreation centres needs PrEP because they face many temptations.	He received a first referrral but he refused taking the drug on a daily basis, however on the day of the interview he had received another referral and he was willing to initiate to prevent HIV. In addition, he was not sure if he would adhere since he never liked pills and he preferred an injection.	he neither had seen PrEP given out in the community nor any one taking PrEP. He said to have known two study volunteers who was referred for PrEP but declined taking PrEP	He hoped to get PrEP from the MRC clinic because it is where he always come and he is familiar with the facility. He however preferred to get PrEP from his community since it will not involve many transport costs in cases where he will be supposed to get a refill not on the clinic visit date.			He believed in disclosing his uptake to other people for they may get interested in taking PrEP to prevent from HIV. He added that the wife also needs to know because she may think he is taking ART instead. However, he was worried that the woman might think he is womanising.	He suggested that more sensitization should be given to men about PrEP and its advantages so that they can be motivated to use PrEP. He added that women should also be sensitized so that they can talk to their husbands/partners who would not be able to attend to the different sensitization meetings/gatherings	He felt at risk since he engaged with many women without condoms and He was wondering how health workers give him HIV negative results despite the fact that he has slept with quite a big number of women. He however said that he only believed the results because they are through phlebotomy other than ‘pricks’. he reported that women; who work or own bars, waitresses or restaurant owners and marrie…	He reported that health workers at the clinic are okay and very welcoming. He also said to having had some transport issues but it was rectified and since then all is well.	A number of people including his sisters, friends and wife knew about his participation and according to him, they were all okay with it. He added that they all wished to join the study but they did not know where to start. He would support other people join the study because he wanted them get knowledge about HIV prevention and routine HIV testing.	He wanted to prevent himself from HIV at least until he leaves the fishing communities back to the village (where he believes there low HIV risk with little sexual immoral and adultery in the villages ). He initially had issues with the amount of blood collected but got an explanation from the counsellor. nothing could stop him from participating unless if old age.	He knew that the vaccine is still under trial and he was thinking whether the vacine will be effective or not	He however said that he would much want to participate in the vaccine trial because unlike PrEP, the vaccine dosage is more likely to be long time and he suggested for at least a six months’ dosage.	He believed that some people might refuse to take the vaccine thinking they might die. He suggested that volunteers be blinded that the vaccine is not on its trial stage or otherwise more sensitization and information about the safety and effectiveness of the vaccine before the trial could help.	He believed that his partner would react positively about him participating in the vaccine trial after all she will also benefit in the future is the vaccine is proven to be effective.	He was also willing to refer friend to the clinic for possibilities of participatiion after receiving information about the vaccine safety and effectiveness.	He had not participated in any vaccine trial before apart from just vaccination of measles
31 year old male	He still stayed in fishing community X though he was planning to move to another fishing community for about a month to do fishing	he was still doing fishing and he based at his community though he temporarily moves to other fishing communities.	He was still single and he was hesitant on getting married after seeing friends disorganised by unfaithful wives. He resorted to having temporary girlfriends because wives also cheat and girlfriends can give him children too	He knew about PrEP from MRC that PrEP is to prevent HIV and that is can	on the day of the interview, he had received a referral letter to go for PrEP. I asked him what had made him change his mind about PrEP and he said, HIV is tricky; someone can test negative when HIV is in its window period. You therefore lay at risk of catching HIV despite the fact that you tested before sex and its PrEP that can save us in such situations”. He prefereed a month or thre refill	He said he has two friends (PrEPVacc volunteers) taking PrEP from TASO to prevent them from acquiring HIV. He said that he had not heard any PrEP being brought to his community before or any other person taking PrEP in the community other than his two friends. he added that one friend said that he always have a headache after taking his pill however he was not sure if the problem was because the …	He was not sure if the participants were getting the pills from the TASO Masaka clinic or the pills were being taken to them in the community since the counsellor told him that TASO started taking PrEP down to the community.	when they see others taking and benefiting from PrEP by protecting them from HIV	He said that some people do not want to talk about PrEP just because it looks like ART. However, he believed that will change after getting enough information.	He believed that friends can be motivated to take PrEP after knowing him taking and they can also remind him to take his pills, in addition parents will be happy knowing his son's HIV protection. He was however worried that the girlfriend might take him for a cheater though he trusted she will understand after he explains.	He suggested a need of PrEP providers to continuously talk to men about PrEP at different centres and points of the community not only in community sensitization meetings/gatherings.	he said he was at risk since he sleep with women of unknown status and condoms burst at atime. in addition, according to him people leaving on fishing communities especially women, alcoholists, Students especially boarding students, People who go clubs According to him, people who stay in villages can stick to their partners with at least a few temptations	He said that he likes it that they receive continuous knowledge about HIV	“My brother whose contact that I gave in as my next of kin knows and he is okay with my participation"		he said he could not tell how the vaccine looks like but he thought it must be an injection because it has always been used in immunisations. he thought that women needs to give birth a break and he believed it was possible according to him all women are already using family planning to regulate their births.	he would participate if it the vaccine has no side effects. In addition, he wished to receive the vaccine and motivate others by acting exemplarysince he believed some people will only participate in anything after seeing others participate	He believed that the vaccine would help to control HIV when people agrees to use it. He said that, people needs to be convinced as it was done on condoms. According to him, condoms were not used well at the beginning but it was after the understanding that it was effective with no side effects that people finally agreed to use condoms. He added that, even ART consumption started little by little …	he said that, they might be scared that the vaccine might cause him side effects. Some have heard people dying after being exposed to such drugs and some knows that drugs/vaccines are only tested on animals.		He had not participated in any vaccination or vaccine trial before.
26 year old male	I relocated from fishing community X to Y (island) because fishing got difficult at X as soldiers were so much against our fishing activities and they were arresting us so much. I decided to relocate to because there at least the soldiers are not so harsh [why?] rich people in community Y who give them some money and they be a bit lenient with us.	Around April this year (2019), I travelled to the capital where I spent a month. A friend had recommended me for a job to work at a maize mill but by the time I arrived, the job had been already taken	he had not been able to find a woman to settle with into marriage. He only get those ones for just sex to relieve him of the urge	A pill that prevents from HIV;	He was taking PrEP by the time of the interview.	"I have ever used the pill but I had complications/side effects using the pill for the first time. The teeth were all paining and I had difficulties eating. However, this came back to normal after 3 days and everything normalised without using any other medications." "The only challenge I have is the daily pill; if possible, the monthly pill can work better”	he received the pills from TASO upon referral from the clinic (MRC)	“I wanted to prevent myself from catching HIV since I never wanted to use condoms yet I used to sleep with women whose HIV statuses I did not know”	busy work schedules that sometimes heforget to take his pills.	to him, parents were okay to know because he believed they could even remind him to take his pills. And friends and other community members could also buy the idea of taking PrEP thereafter	he said that men needs more sensitization about PrEP and how it works. He suggested community/public announcements that men will always turn up for sensitization.	he never felt at risk since he was adhering to his PrEP	he wants to get more knowledge to protect his life and he was happy being given a variety of options or prevention measures plus counselling to protect our lives from HIV. He disliked the fact that they sometimes delay at the clinic especially when they arrive during lunchtime when the nurses are having lunch. he confessed to delay at subsquent visits than the initial visit. he had no issues with…	several people knew he was participating and they all wished to join. He was also willing to invite others to help them prevent HIV.	Nothing would stop him from participating; it could be transport expenses but he always gets his refund at the clinic	He believed the vaccine would reduce Seroconversion though he was not sure of whether the vaccine may be either an injection or pills.	"Yes, if it’s not putting my life in danger in terms of sicknesses/ death"	He said he was worried of the unseen side effects like sicknesses (headache and stomach-aches). He preffered a vaccine since other methods were not being administered into the blood like the vaccine hence their being un adhered to. He added that it’s difficult to always move with condoms	“They may think am HIV positive”	He was willing to pass on information about the vaccine safety and effectiveness.	he said he will only participate in future studies if he ‘benefits’ from the current study by protecting him from HIV. He however added that he may decline to participate if he encounters challenges like infection e.g. STDs. He had however had no prior experience with vaccines	He had no questions
35 year old male	still lives where he lived at the first interview	was involved in farming and it is what he is still doing	he has two regular partners but he is also engaging with other women. He said if he comes across a beautiful girl during his travels, he has sex with her.	He knew that PrEP was ART and is taken daily like ART. He thought that one could only get PrEP if MRC gives him/her a referral	he could not take PrEP on a daily basis maybe if it was an injection of a bit long interval ‘dosage. He was also worried of misunderstandings with the partner if she happened to find out. He added that unlike the injection, the pills could not be hidden from your partner and she will eventually find out hence misunderstandings. However, the injection is administered at the health facility and aft…	He had neither heard anyone taking PrEP in his community nor an organisation taking PrEP to the community	“X and Y (government health centers in the community) are fine because they are near to our community and it will not necessitate much transport"	he felt in need of PrEP since he still wanted to have sex with different women yet he never wanted to get infected with HIV.	he said that they just do not want	He said that the wife should know for she might even remind him to take his pill especially when she is around during the time to take his pill.	“Increased sensitization to the communities especially to the wives so that they can talk to their husbands about PrEP. This can work the same way as it has worked with condom use where women always ask men to put on condoms”	he believed he was highly at risk to the extent that he does not believe it sometimes when he tests at MRC clinic and get negative results given the number of women he had slept with in the fishing communities. He added that he sometimes get beautiful women during his travels and he ends up having unprotected sex with them. I asked him the number of partners he is having at a time and he told me …	he liked the routine testing and counselling, that it helps him to maintain his current partners knowing that they are HIV negative other than getting new partners who may be infected. He added that the health workers are okay; they are caring, welcoming and gives him counselling especially risk-reduction.	his friend who was also the next of kin knew and he was supportive. He reminded him about his clinical visit every time the field team contacts him in case his contacts were off		He knows that the organization is preparing HIV negative individuals to give them pills (PrEP) that will prevent them from HIV. He however added that PrEP is not yet at the station and the volunteers are referred to TASO currently. According to him, the drug (PrEP) is to prevent them from HIV after exposure to the virus. However, he said that he would prefer an injection to pills.	He said he would participate in a vaccine trial because he had received continuous sensitization and information about the study	if am supposed to receive an injection every after one week, it will be much costly if I have to travel to A. It would be better if it is at least a monthly injection”. he said that health workers needs to concentrate on the positive people than the negatives. He added that he was worried about what the drug will do to the body (side effects) since according to him vaccines are given to infected …	He said that he did not know the reaction of his partner after knowing him participating in a vaccine trial, maybe she may think that he might die.
21 year old male	He currently stays in some fishing community but usually comes to fishing community X to meet the wife where he usually spend close to a week. He sometimes goes to a fishing community near the capital. The last went there in March for a week.	“Work is still the same just that we are making a few earnings these days due to the rains that come with winds; which does not support fishing. There is too much rain and all the roads to Masaka are in poor conditions”	he said that he has had like four partners in current community since the year begun plus the wife who lives in X. he added that the current relationships he is having in Buyange are not ‘serious’ and he does not made any plans of marrying a woman in the place. He added that the relationships he is having in current community are not serious.	“When you use PrEP, you may sleep with an HIV infected person and you do not catch HIV”	according to him, one should take pills after getting sick or infected because there be no option left. he was not willing to take PrEP and he was ready to take ARVs in case he gets infected other than taking pills when he is not infected. He added that he is always busy and he can easily forget to take his drugs.		he would wish to get PrEP from and he said in the community.	a weekly pill, a monthly injection and a PrEP pill partner so that they can always remind each other can motivate PrEP uptake and adherence	he said work and lack of time is one of the barriers to PrEP uptake as some travellers can always forget to carry their drugs with them hence missing on their dosage. Alcoholics will also forget to adhere well to their drugs.	according to him friends can remind him just in case he forgot to take his pill. the wife needed to know because she could land on the pills at any time hence misunderstandings. However, mother should not know as she considered this as family secrets. However she added that the wife might think he was a womaniser as she maynot see the need for PrEP if he only slept with her	“You need to sensitize men down in the communities and those who fear to catch HIV will come for the service.	youth (female and males) were the most at risk because they sleep with many partners. He added that women in child bearing age were also at risk because they would not wish to catch HIV and infect their babies. According to him, adult men were also at risk because they have a lot of sexual partners and they never wish to put on condoms. He was not sure if he was really at risk though he confessed…	he said that he would wish to learn more information about HIV prevention so that he can talk to his friends and gives them that important messages He added that he is okay with all the procedures plus the health workers.	he said that he had a friend who knew about his participation but he was okay with it. he would encourage other people to participate in such a study he would want them to get more information on HIV prevention measures.		he said he thinks the vaccine will be in a pill form	he expressed no fears as far as participating is concerned.	He added that he needs the vaccine because he sleeps with a number of partners without protection and he goes to enjoyment centers. He therefore believed that the vaccine can offer him protection. About the woman getting pregnant while using a vaccine, he thought that the woman may get a miscarriage	“She may be worried that I may trust the vaccine and live recklessly for example having unprotected sex which may result into catching HIV and later transmit it to her. She may also fear that I can lose manhood (sexual) and lose my family as well"		he received the yellow fever vaccine and he never experienced any issues with the vaccine.
20 year old male		About work, he said he is still doing fishing. Although the law enforcers are heavily on the lake, he said that this does not affect so much on silverfish fishing that he does. He added that alongside fishing, he does other jobs like performing karaoke in different places as long as he is invited to do so. He mainly does this in the festive seasons for example he was in district K (in the south w…	he had gotten a woman and he was married the same girlfriend, he had during the baseline interview	according to him, PrEP is the pill that prevents from HIV	he said that a health worker at the MRC clinic asked him if he wanted to start PrEP, which he did not agree to because he said that he is in not in good ‘terms’ with tablets/pills and he preffered another option like pills like an injection. according to him, all HIV negative people need prep; youth and sexworkers.		He did not where to get PrEP from though he preferred getting it from community government facilities to avoid stigma attached to organisations like TASO.	he said that it would be best if PrEP were brought down to people’s homes. he said that he would prefer a refill interval of one month since it is the first time, because he need to start little by little with close observation and consultation from the health workers		He was willing to take PrEP with knowledge of the wife to avoid misunderstandings. he believed the wife would support him since she is well aware of the conditions in the fishing communities. he added that he is also unaware of the wife's whereabouts. He added that his parents also need to know because they may think he is infected. He however said that he might not disclose to his distant or not…	“Musawo omuntu gw’otakwate lwampaka omuleka bulesi, oba alawadde y’amanyi, meaning that we cannot force humans to do things against their will; we better let them only to realise after seroconverting. Take an example of VCT; people always wait to have a good reason like exposure to go for testing. I do not know and I cannot advise in anyway’’	“I am not at risk; I test every after 3 months to know my status, I do not live in any fear. In addition, I tested together with my wife in June this year and we were both negative. I use condoms every time I sleep with other girls most especially when I happen to travel to other areas to protect from HIV and other sexually transmitted diseases.	“Everything about the study is okay; I always come for my visit when am free with work so my work is not affected. However, sometimes the motorcyclists here overcharge us especially when they do not know the location of MRC”. He added that the health workers are also okay.	the volunteer's wife was also participating in the cohort and they were okay witheach other. He was willing to encourage other people participate in study because they would get an opportunity to save their lives from HIV.		“The study is about helping us protect ourselves from HIV through routine testing and counselling and PrEP provision.	I would let others participate first so that I can see if the vaccine works but however if I happen to be chosen, I will still agree to participate and serve exemplary.”	He believed that the vaccine would be accepted although according to him, some people might fail to believe in the vaccine.	He said that the wife would have to agree since she cannot influence his decisions or else make him change his mind. He added that the parents might be okay with it because they will know that he making a good thing for the rest of the populations. He also said that friends maybe motivated to use the vaccine when they happen to see him participating and being protected from HIV.		He had never participated in any vaccine trial before, however he received the yellow fever vaccine but he did not get any side effects.	In case I happen to agree with my wife, how do I get PrEP?
31 year old male	Lost to follow-up
23 year old male	“I travelled to district G towards the end of April am expecting to return to A after the end of next week because this is where i consider as home"	“my job is still the same just that our work is seasonal but most of my work happens in place A. As I told you, I was transferred from G to here (A) but I am sometimes called back to do some work in G since I had established some customers before my transfer”	he sometimes stays with her ‘wife’ in the capital though they are not official partners. He also added that he considers her to be his own though he is not sure if the same applies to the girlfriend [if she only has him and considers him a future husband]. this was the same girlfriend during the first interview. he added that he maintains casual relationships because they ‘support’ him during his…	“Before I had just heard of PrEP in the outside countries but it is now here (in the country); I was told it would be good for myself to take PrEP because I sleep with multiple partners. [Who told you that?] “My personal doctor-friend; he told me that people who goes to bars and drink alcohol usually lose their personal judgement and right decision making hence sleeping with HIV positive persons …	“Ekyali nzibu; nkyagitidde, yo nnungi naye njakwambala. Meaning that despite the fact that I know that PrEP is good, I am still scared to take it, I rather use condoms”. According to him, People with ‘strong bodies, the youth and the alcoholics, People in discotheques who sleep with HIV positive people without using condoms just to realise what they had done the following day, married who cheat o…	He said he had not heard about PrEP in district Gunlike in A. He added that he is not sure if people are not taking PrEP in hiding. This is because he has heard men in bars talking about ‘preventive’ pill in bars and some brag showing their negative HIV results to each other yet they say they have slept with HIV positive women. He added that catching HIV might be ‘kisiraani’ (bad luck). I asked h…	“They told me that they can give me a referral later so that I can go to A Hospital so that I can be initiated on PrEP. he would hope to get it from MRC because he is even scared of going to TASO saying it is so public in that everyone goes to the place, and think he is going for ARVs. he said he would prefer after 3 months to save on the journeys made.	there was a time when we were clubbing so much and we used to sleep with girls out peer influence, it was only God that protected me”. he said more sensitization of the masses could help, as a few people knows about PrEP. According to him, the health workers only knows PrEP and he added that there is a need to pass on information to the youth. He added that easing PrEP access could also easy upta…	he said that he is highly affected with ‘simple’ sicknesses like cough, simple scratches and fever among others. taking PrEP can motivate me to go back to my usual behaviours since I know I am protected” he said that only fear of side effects could prevent PrEP uptake.	I went and asked my ‘wife’ and she told me to hold on starting PrEP”. I asked him why and said that “Nja kweyongera obwenzinga ne bamalaaya nga sitaliza meaning that I will become more adulterous sleeping with even sex workers of whom I know they are positive. I tried to explain to her the advantages of PrEP and the fact that she can also be tempted to sleep with other men since we are in a dista…	He said that men need to be approached and talked to at their gathering places like sports/play grounds and in the bars especially the ones who take alcohol however this should be done exclusive of the women.	his risk is less since he uses condoms most of the time. According to him, a girl showing or saying that she is scared of HIV before sex may be negativeunlike the grown up girls or women who dislike condoms and always complain as how the condoms burn them, young girls ask for use. According to him, people usually have a lot of free time to engage in many risky behaviours during the festive season…	coming here (MRC) has helped me so much in that I can sit and reflect on my behaviours and change for example if I were having ten sex partners I can reduce. He added that they are called a bit late to be reminded of their visits i.e. on the exact date of their appointment which doesn’t give them time to prepare to travel hence coming late for their visits. I asked him if he did not have a partic…	He told that his elder brother knew, I asked him how he knew and he said that he gave in his contact as the next of kin and the field team contacted him several times trying to reach out to the participant however, he said that he did not take it in a good heart and he quarrelled with whoever called him. he would encourage other people to participate in such a study because they talk their own he…	discussing health issues with health workers brings hope and motivation to live negatively, we have seen boys as young as 16 years and have already lost hope (living recklessly) and even their parents have abandoned them” “Giving me a drug and I starting getting sickly I can drop out and maybe when it is too much of time consuming like a whole day (morning to evening)"	“I think HIV will be ‘over’ when they introduce the vaccine; the negative wiil be vaccinated and there will be no new infections and the current positives will eventually die”. About women, getting pregnant using the vaccine he said he did not think it was right since the mother is not supposed to decide/consent for the unborn baby yet the vaccine could be dangerous to the baby.	he would consider participating because he would wish to prevent from HIV even if is to sleep with HIV positive women. In addition, the vaccine will not be taken on a daily basis like PrEP	according to him, introduction of the vaccine will increase adultery/unfaithfulness as people will have nothing to worry about or to prevent from”. he said sensitization is needed to inform people about the vaccine and the available prevention measures	She (the girlfriend) will be worried at first be she will later understand given the fact that I do not live with her; she will know am ‘scared’ of HIV		He had not participated in any vaccination or vaccine trial before.
22 year old female	After getting the Africel job, she moved to live near her elder brother in the surbubs of the capital	At baseline, she was working as a mobile money operator along Entebbe road and she was working for someone. At follow-up, she had managed to raise money and bought second hand lines for MTN mobile money and Airtel money but one day when she was returning home, a thief snatched her bag and took both lines. She bought these lines in February and had used them for like two months. Currently, she is …	At baseline, she had a steady partner who lived in Kyotera but she did not take the relationship seriously as he was not financially supportive. She ended the relationship with this partner much as they still communicate. She currently has a new partner who works for National water but although her steady partner is abroad and is returning this year to start her up a phone business which will be …	People in the community where she now lives do not know about PrEP and they did not believe the pill existed. Initially, she thought that one needed to swallow just one pill of PrEP and that this one pill gave protection to the body (worked/stayed in the body) for 3 months. Health workers at TASO told her that PrEP is a replica of the latter (ARVs). They told her that if you swallow it for 2 week…	"I thought it was just one pill to take me for 3 months and did not know that I was to take it daily. It causes a lot of thirst and if you do not take lots of fluids. I can never swallow it again. The truth is, if you do not have money, you should not swallow that drug’. You swallow it and feel it laying in the throat requiring you to drink lots of fluids" health workers told her that the pills w…	She swallowed for only two weeks and stopped due to side effects. She was experiencing dizziness, headache, general body weakness, hunger and vomiting.	At the study clinic, they gave her a referral for PrEP to TASO, Mulago in Kampala where they gave her a tin of pills for one month	She suggested that PrEP; should be availed in health centres within the communities - They (health workers) should not tell a person in Mbarara to pick PrEP in Masaka - should educate people about PrEP - health workers in communities should dispense PrEP e.g. you may explain It (PrEP) to a person in Kampala but you cannot tell them to go and get It in Masaka, It has to be rolled out (widely sprea…	"First of all, it is very hard to convince someone that there is a drug that prevents HIV. Secondly, taking pills daily like an HIV-infected person is not easy either. Again the side effects, no one can stand this"		‘With that drug, you have to thoroughly explain to a person and give them a health talk, and in fact a thorough one’ For the men, they just need a health talk, and a thorough one but they can accept it'	She never felt at risk although she had decided to take PrEP because she had another partner she never trusted. She believed it was one pill per month. she also never used condoms since she had tested with her partner in Kampala.	She and some of her friends were bothered with the 'much' blood drawn yet they only receive results for HIV testing	She shares with friends and they also wish to join. None has ever discouraged her from participating except when she tells them about PrEP. ‘That is why I said it needs a thorough health talk’.	She is attracted by the free services like free medical treatment of any ailments she has, the clear information she is given. She added that staff are very good people who are willing to give advice and has not had any problem so far.	She had informtion that the study vaccine would be introduced in a period of a tear	The participant is willing to continue participating in the current study and even future studies. She would participate if the vaccine had fewer side effects.	She was looking fpward to the injection since it was longer term than the daily pills and she believed the side effects would also be short term i.e. after the injection. She was however worried that it might be like the family planning injection which stops one from experiencing their menses or it could cause body some bit of body weakness but the fears were fewer/less.	About how people around her might react about her participating in the vaccine trial, she said that unless they hear that it could cause problems but if not that, they cannot stop her from participating.	‘I can only give information about it after using it and knowing how it works.
40 year old female	She had not changed location	She is still doing laundry work and the location of her laundry has not changed. She reached an understanding with the landlord to occupy one room and the rent money reduced to 50, 000 shillings a month instead of the 80, 000 shillings for two rooms.	she is still cohabiting with her partner but his sexual condition has worsened and they no longer have sex at all because he is now completely impotent but he has not sought any treatment to reverse the problem.	Apart from those people she talked to, other people in her community do not know about PrEP. She added that she shared with only one woman who had heard about PrEP before and she had heard about it from her sister. She added that even when you shared with people that you are on PrEP to prevent you from contracting HIV, they do not differentiate it from ARVs. Even the children at home (the ones sh…	She started and motivated her stepgrand children to start PrEP. She also pased on the information to the neighbors although they were reluctant PrE$P	For the first two months, she used to experience headaches starting at around 6.00pm in the evenings up to 10.00pm. she would also experience episodes of stomach upsets resulting in diarrhoea but these have cleared apart fromthe heightened appetite for food. In the beginning when she had just started PrEP, she found the pill big to swallow but she would break it into two pieces and still swallow.…	She acceseed his PrEP at TASO although she prefered accessing PrEP from MRC clinic during her clinic visits. She preferred a 3 month refill to save on the journeys	The fact that she disclosed about her PrEP makes it easy for her to take it and it does not require her to take it in hiding, so she feels disclosure is important for one to comfortable take their PrEP. - Also the fact that other people in her household are also on PrEP is helpful. Now that they were all taking at the same time of 9.00pm, they would wake her up to take her PrEP if she was sleepin…	other people fail to go for their PrEP refills claiming they do not have food to take PrEP. Others just did not know that they had to go back for refills and thought that the initial batch of drugs was all they had to take. She had no issues of stigma and is not concerned about being seen at TASO.	She disclosed to household members including her partner that she is on PrEP and she even encouraged members of her household to also get onto PrEP and two of their girls (partner’s grandchildren) are also on PrEP and they have been on it for 3 months now. Given the fact that she disclosed to the household members, she freely takes her PrEP and neither does she hide the pills nor take them stealt…	Community sensitization with only men and health camps with different service providers e.g. HCT, PrEP provision e.t.c	She believed that all women bellow 70yrs are at risk either because they are sexually active or prone to rape anytime. She believed at risk since she is still sexually active and the partner no longer provides both financilaly and sexually. She could not influence condon use and according to her, men are hard on HIV testing.	She wanted to continue with the cohort to acquire more health related knowledge like HIV prevention. She suggested for HCG tests be done every after 3 months as 'stated' in the information sheet. She also suggested for afinger prick for HIV tests to save her the pain of phlebotomy especially on both hands if the health worker misses the vein.		Moving to distant places would make withdraw from the study. Sometimes the healthworkers at the clinic are harsh and this could make her drop out	She is worried that they are going to expose her to the virus	The fact that she does not know how it will work or how it will be done, not until they give her information about the vaccine so that she understands it clearly and base on that to decide.		She informed her partner about her participation and he did not have any problem with it at the start. However, things have now changed and he no longer wants contacting her on his phone. She said that the last time MRC staff called his number, he quarrelled a lot to the children and when she returned home, he gave her a paper with the office number and told her to tell the people who called that…		She knew about measles, polio and whooping cough vaccines for children. She also heard about the hepatitis vaccine (erigema ekibumba) which was given by the Buganda government in her community. she was not vaccinated as she did not have money to pay for vaccine. She would have taken it if it was free.
22 year old female	Since the last interview in January, she did not return to the capital city until June when she went to attend to her father who was hospitalised in the capital city. Currently lives in her home village, about 150km from the capital.	At the last interview, she was selling fried snacks and was working for someone. Her employer wanted to engage her in a sexual relationship but she refused and left the capital. she Since then, she does not have a paying job. She now do dig in the village for a living	She was 7 months pregnant and the pregnancy was detected here (at MRC) at 3 months when she had come for her clinic visit. When she took his son to visit the father, he impregnated her but ever since he learned that she was pregnant, he disappeared and lost contact. She currently hates all men and had no partner. She even wanted to terminate the pregnancy but the study staff advised her not to.	ever since she expressed her dislike for PrEP, they have not talked to her about PrEP on the subsequent visits. Some people in the community knew about PrEP but when she discussed it with others, all said No. She does not know why they do not like it.	‘I do not consider myself at risk so I see no reason in taking PrEP. I am not a promiscuous person and all I want is to work.							‘I do not consider myself at risk so I see no reason in taking PrEP. I am not a promiscuous person and all I want is to work.	she said that she would be willing to continue if they only ask her questions and do not take her through other processes. By the end of the interview however, she was more relaxed and even agreed to talk to the counsellor much as she had indicated on arrival that she did not have time. She had no problem with them and the only thing that will give her a problem is the drug (vaccine).		She had missed research visits and she was scared of coming now that they had told them initially that they did not want pregnant or breastfeeding women. For the pregnancy she got it accidentally for she was on family planning. She had gotten this family planning at some private clinic and she would get refills every 3 months but then she started getting a funny feeling in her stomach		‘If they are not going to inject me with drugs and they will only ask me questions, I will continue participating but if it is about giving me drugs, I will not’.	‘bayinza okunkuba eddagala nessiyisibwa bulungi, obulamu nebwononeka paka kufa oba okufuna akawuka’. Meaning ‘they may inject me with the drug (give me the vaccine) and my health gets complications, the health could deteriorate to the point of losing life or getting the virus (HIV)’.
26 year old female	While in former fishing community, the landlord told them that s/he wanted to make repairs to the house where they lived and that is when they decided to relocate to this nearby fishing community.	She is not working up to now and totally depends on support from her partner. she lives with her two children who are aged about 5 and 4 respectively together with the partner. however, this partner is not the children’s father but he takes good care of them. She said she wants to resume work but she will this time set up a bar and she said she had already bought some of the items to use. she is …	She still lives with her old partner	She got Knowledge about PrEP from the study clinic. She said that in this new place that she relocated to, she has never heard anyone talk about PrEP. It seemed people there did not know about PrEP.	Initially, she felt PrEP was something very new which she needed time to know better before she could give an opinion of it, which she got. At this interview, she felt a need for PrEP because she did not trusted her Partner.		She could not access PrEP much as she felt a need for it because of transport costs, which she said are very high.		she indicated transport costs as one of the barriers and she indicated it as the reason as to why she had not accessed PrEP.			She felt at risk as she never trusted her partner	She liked the free FP sevices at the clinic as an injection costed her 15000 shilligs at private clinics in the community clinic. Surprisingly, she had missed a couple of her clinic visits attributing it transport costs.	Her friends as well as her partner knows she is participating in the study because he was also participating but he dropped out because clinic appointments coincided with his work schedules.	She said she is very willing to participate because even mere testing of HIV is 5,000 shillings in private clinics yet MRC gives this service freely and she would also get free medical treatment whenever she falls sick if she is in the study.	She knew that the vaccines are under trial. They were told that they will not recruit people who are pregnant or those who are breastfeeding as they were testing the drug (vaccine)i.e. they do not trust it completely and they do not want the baby to get any issues arising from the drug. "It was supposed to be introduced this year (2019)"	She was willing to participate in the trial; she aborted her pregnancy to be able to continue with the study. However, after the follow-up interview, the participant was again two months pregnant although she claimed she was on an injectaplan. She planned to terminate the pregnancy saying she was too old to give birth.	Altough she had some fears for the vaccine, she was willing to participate as she belieeved that if she refused, other people may also refuse hence failing the trial.
30 year old female	She had spent a month in district C attending to her 12 year old sick daughter and she planned to return to the neighbouring district where she lives, as the daughter was getting better. She mostly lives here and that is where she mostly conducts her sex work. She however has a house in Nyendo that she built together with her elder sister and that is where she comes to rest.	While in district C she could not do sexwork as the relatives would realize. She just stayed at home.	She currently had no partner. "I got tired of them because they are promiscuous and besides, they cannot support you financially"	Acccording to her, PrEP was a combination of 3 drugs but it is now a combination of 2 drugs. The other information she now has is; - that you take PrEP with food, it should be swallowed at a time when the weather is cool (obudde nga buweweevu) - the drug causes nausea but this is for a short while. - At first, she was told that PrEP had to be taken for 21 days before it started working in the bod…	She felt a need for PrEP because she engaged in Sex work. She never trusted the efficacy of PrEP. She used to fear swallowing PrEP but after seeing other people on PrEP, she no longer fears	At the first interview, she told me she was off PrEP which she had taken for only 11 days and left it due to side effects. She is back on PrEP and has been on it for two weeks now. A friend of hers who is also in sex work advised her to get back onto PrEP. This friend was on PrEP but she did not have any issues/problems with it. The participant returned to TASO and they gave her another drug type…	She got PrEP from TASO	She decided to go back for PrEP because she saw that she was at a risk of HIV and needed protection. Her friends advised her to resume after encouraging her that the drug was good. She believed that bringing prEP to the community would motivate uptake; it saves transport especially in women who never disclosed uptake to the partners. community sensitization was aslo suggested		Community people did not know about PrEP. for example a sister that works for a certain ART giving NGO in the region concluded that she was taking ART and she claimed that there was no such pill. Her young sister also reported that she saw her swallowing pills in the latrines which the participant denied doing. She said it is okay for the family members, for example her sister to know she is taki…	By taking services nearer to them - When one happens to get information, he spreads it to others - Or even their wives could spread the information to their partners - The fact that they fear HIV now that it has no cure - If people who conduct HIV testing and counselling had drugs with them which they dispensed after testing, people will rush to test	she decided to go back for PrEP because she saw that she was at a risk of HIV and needed protection. She still considered herself being at high risk of HIV now that she has not completed the 21 days yet and she will feel at less risk after completing the 21 days on PrEP.	She has acquired knowledge about PrEP and she has encouraged friends to also get onto PrEP. So, the desire to acquire more knowledge is what will motivate her to continue participating.	Her sisters as well as the friends know that she is participating in the study and they have no problem with it.	About the study procedures, she feels that all procedures are good and that nothing should be changed. She feels there is nothing that could stop her from participating in the study. It would have been the transport but even then, it is being refunded. She feels that her experience participating in the current will even motive her further to also participate in future studies. She feels she will …	the study is about pills that prevent HIV and an injection for HIV prevention will also be introduced this year (2019). She said that people will like the injection better and may even stop the pills as they know that taking ART when negative is dangerous	She will participate after seeing other people participating	if she sees people are healthy on the vaccine, she will accept it like she accepted PrEP; she will know that there are drugs for HIV prevention. She said that people will accept the vaccine because it is easier to take compared to the pill. Some people are not good at swallowing drugs. She believed that people with PrEP information would easily accept and believe in vaccines		she would tell them that there is an injection that prevents HIV and that it is easier to take compared to pills. She however, saw a challenge to childbearing age people since one is not supposed to concieve during the trial		Do I get any problem if I stop PrEP suddenly without notifying the health workers?’
18 year old female	at the first interview, she lived in some fishing community, in X district but she moved to live in a town in another district	did not work at baseline, is currently working in a bar	broke up with partner she had at baseline and got a new one but is carrying a pregnancy from the former partner. Planning to give the child to the new partner	does not know much regarding PrEP, only that it protects one from getting HIV	Feels she does not need it as she is not promiscous. Noted it would benefit those in multiple relationships, sex workers and individuals who engage in transaction sex.	has not initiated it			said nothing can prevent/stop one from taking up PrEP if they really want it.		Men who are already on PrEP should be used to attract their fellow men by talking to them.	Does not consider self at risk since she did not engage in multiple relationships.	She likes all the study procedures and feels they are all benefitial	her friends and also her partner knows she is participating and the partner has no problem with it as long as she is HIV negative.		she was told they were going to introduce pills that prevent HIV	She will first assess if she needs it and if she does not, she will leave it.			not captured	not captured	None
36 year old female	still lives where she lived at the first interview	still sells cooks food to fishermen(packs it for them when they are setting off for the lake	maintained that she still has the partner she had at first interview though he visits the community once in a while. She does not trust him though. Said she has no time for relationships as her works keeps her very busy.	has very little information regarding PrEP. Knows that it prevents one from catching HIV but thinks it is taken for 4 months and one stops, got this information from her community	would wish to take PrEP because her partner is a married man and they have never tested as a couple, neither does she use condoms with him	has not initiated PrEP but has a friend who initiated it and stopped due to side effects	she does not like the place (TASO) where PrEP is being accessed as it doubles as an ART facility. She is waiting to access it at the research center when it is availed	she likes it because it would protect her from getting HIV since does not trust her partner	she feels that nothing can stop her from taking PrEP if she gets it	Felt that other people knowing about it if she were taking PrEP would not bother her provided she was protecting her life.	men should be talked into taking PrEP by their partners.	Considers herself to be at risk since her partner is a married man, she doe not live with him and does not know what he does in her absence. Again, they do not use condoms.	she likes all the procedures		she has no reason to refuse participating in studies as it is for her own benefit.		Is willing to participate as she feels she will learn a lot of new things	seemed to confuse the HIV vaccine with PrEP		not captured	Not captured	None
37 year old female	Currently lives in town H in the eastern part of the country where she moved for work. It is where she lived even at the first interview	she has not changed her work. She decided to do her sex work in a far away place where people do not know her. She no longer parades at the roadside (street) but sits by the door of her room and her clients (mostly the regular ones) find her there. She looking forward to the work season, which is about to start. Farmers are about to harvest and traders will also flock the area, while other busine…	no longer likes engagement in serious relationships. Only has clients though one of her regulars is proposing a serious relationship, something she feels will put her at risk of HIV as it will mean dropping condoms.	It is a pill that prevents HIV and is swallowed on a daily basis and at a specific time and that it has to be taken for a full month before it starts working in the body. They again told her that if you feel that you are no longer at risk of HIV, you could discontinue PrEP.	expressed a liking for PrEP but has doubts about its efficacy. She feels it may not completely prevent HIV as is the case with family planning in controlling pregnancies.	took it for a short time and stopped due to side effects but her friends have encouraged her to re-initiate it, which she is going to do.	the place where she was referred for PrEP is very far from where she currently lives and is foreseeing a challenging of failing to access it due to the long distance.	has been all along getting protection from condoms but is planning to drop them now that she is a planning a serious relationship. This motivates her to take up PrEP as it will give her protection from HIV.	the long distances to PrEP facilities have prevented her from accessing it.	she has discussed PrEP with friends and they encourage her to re-initiate it.	their wives should be the ones to talk to them about PrEP now that men tend to listen to their partners better.	she has consistently used condoms since she only has sexual clients, which have worked for her. She is however foreseeing risk as one of clients has proposed a serious relationship.			For her, she cannot refuse to participate	Were told it is an injection that will be administered in 3 months' intervals and would be available by June but it never came.	would wish to participate now that she wants protection from HIV	Is looking forward to the vaccine				None
23 year old female	has not changed residence from first interview though she moved to a neighbouring country for some months to attend to her ailing mother.	she still keeps a shop and a market stall though these remained closed while she was away.	got a new boyfriend whom she has had for about 3 months now	she did not have any knew information from what she had at the first interview.	she sounded not so decided about PrEP. She did not like it before but this time claimed to have understood the importance of PrEP but was not willing to take it unless it was packaged differently.	has not initiated it but is very uncomfortable with the way it is packaged and feels this might prevent her from initiating as it is not different from ARVs.		giving people information about PrEP and telling the good in it could motivate them to take it.	fear of swallowing pills.		women should talk to their partners about PrEP, especially during their leisure time. They should bring up this topic and tell them the good in it.	She does not consider herself being at risk of HIV because she is not having sex with anyone currently. She said she is still studying the new partner that she got and they have not completed the tests yet.	liked the study and all procedures and wished it could extend to other people as there were so many people out there who did not know about PrEP and would have wished to take it and those who would wish to participate in the vaccine trial.		feels she has received used information in the study which can even extend to others to help them remain HIV negative. Another thing that motivates her is the good way that staff handle them.	she had earlier that if you complete your vaccine doses, you cannot contract HIV but the health worker told her that it was still under trial and did not know if it prevented HIV	she is willing and determined to participate much as someone told her that with vaccines, they give you that particular virus	Like other people, she likes it as it is not to be taken daily; you get your injection and complete your dose. She however worries about the side effects.				None
36 year old female	relocated from the landing site to some Island on Lake Victoria and she has lived there for 4 months now	Currently, she supplements her sex work with income for her job as a cook. She said that she has now reduced her number of sexual clients since she is also earning from this other work	At the first interview, she was planning to get a stable partner and settle but has not landed on one yet. She only has sexual clients but she claimed to have reduced the number of these.	Although she still had little information regarding PrEP, she had new information of where it could be accessed and she also knew that it was for preventing HIV.	She still had fears of PrEP from the friends who had taken it and got side effects. She still thinks that drug could still be under trial and not good for use yet. She feels she needs it and will use it but after it is proven safe.	Her friends took PrEP and got side effects. This caused her to fear PrEP thinking it was still under trial and not yet safe for use.	If she initiates PrEP, she said she would prefer to get it here (at MRC) and she would want 3 months refills. She added that availing it in her community is also a good idea.	In her case, she would be motivated to take PrEP if the staff assured her that it is safe.	For her, what is preventing her is fear and distrust of PrEP. Thinks it could be under trial	freelydiscusses PrEP with friends		She still felt she was at a high risk of HIV now that she was very sexually active. It is by God's mercy that she is still HIV negative but she thinks she will contract HIV anytime.	she did not have any problem with any procedures. ‘They handle me well’.		The desire to find a cure for HIV motivates her to participate in the study.	They were told about the HIV vaccine trial by staff at the research centre.	she would be willing to participate in taking up the vaccine when it gets here, she said she is willing to participate and she is looking forward to it.	For her, nothing could stop her from participating because she is promiscuous (meaning that for that reason, she needs the vaccine). She said other people will take up the vaccine because no one wants to die.			She can only say something or suggest the vaccine to others after taking it and knowing how it works.	None

## Sheet: FGDs
FGD Category	HIV			PrEP						HIV Risk Perception	Acceptabilty to study procedures				HIV Vaccine
	Mode of transmission	Prevention Measures	Perceptions	Knowledge About PrEP	Attitudes towards PrEP	PrEP Disclosure	Access to PrEP	Motivations to PrEP Uptake	Barriers to Uptake of PrEP	Most people at risk	Study procedures	Likes, Dislikes & Recommendations	Reasons for Participation	Reasons for Non-Participation/Withdrawal	Knowledge about the study	Attitudes on an HIV Vaccine	Suggestions for dissemination	Questions
Older men (35+ years)	Atributed HIV spread to condom non use, alcoholisim and drug use as well as forced marriages. Regading modes of transmission, blood contact in case of accidents, unprotected sex with a person of unknown status, sharing of sharp objects Rape, sex, kissing, mother-to-child transmission, accidents, sharing of objects like tooth brushes and razor blades and abstinence from sex/faithfullness to partne…	PrEP, faithfulness to one partner, condoms, circumcission HCT	According to them, men mostly fishermen in the community are aware of the presence of HIV but they are instead not bothered at all. In addition, some people have a saying that HIV no longer kill like other diseases like cholera that kills instantly. This has made them lay reluctant as far as HIV prevention is concerned.	Only one participant had about about PrEP before from RHSP but the rest heard about PrEP from MRC and about 3 participants were on PrEP by the time of the discussion.	P6 said that he had heard people say that PrEP have many side effects but he said that he was taking PrEP and he never got any side effects. Added it is good but peole are not aware of its availability. P1 felt it would have been good if were not to be taken on a daily basis like you are HIV-infected, - daily pills is an issue and would prefer 3 months' injections/on demand	Participants were worried that disclosure might bring misunderstandings between partners and they suggested that MRC should talk to the partners first.	they preferred to get PrEP from MRC and in the community since some take months without going to Masaka.	People would be motivated if not for a daily basis i.e. a 3 months injection. The 3 months injection will again save them from the partner and community member suspicion for freuenting the clinic. The fact that PrEP had minimal side effects unlike ART also motivates people stay on PrEP. the dislike of condoms was also to motivate people use PrEP. All agreed that creating awareness among communiti…	the issue of taking pills daily, - the stigmatising nature of the PrEP facility, lack of confidence to persist/adhere, no need for PrEP, fear of misunderstandings with partner, sstiaccording to the them some people are not aware of PrEP availability; more sensitization was sugested to inform people about the service. Pill burden, stigma at TASO, P9 said pills make him sick. Two Participants never…	fisher men, women, and women in early marriages. Alcohol was mentioned as one of the sgnificant factors putting people at risk, however P3 who was also on PrEP disagreed with them and he gave his own testimony. “I left alcohol 15years ago but I still sleep with quite many women and I currently have 3 women; this is not under the influence of alcohol. I was very pleased when this ‘project (PrEPVac…	participants report individually on their scheduled date; on arrival, he receives pre and post-test counselling, VCT, he answers some question (risk assessment questionnaire) receives information about PREP and usage, receives condoms if he wish and he lastly receive transport and leave.	they were happy about the routine HCT and allowances given to them. Altough healthworkers were reported to be good to participants, there was a concern that MRC is not giving them test result slips like other health facilities or organisations	the desire to remain HIV was a driving factor for participants to enrol and keep in the study.	there was discouragement/ negative influence from friends who scared them about the side effects of PrEP	most of the participantsknew that, the study was on HIV preventing and some noted they were being prepared for future participation in HIV vaccination, however according to them, the vaccine is not under trial. While the rest knew that the study is just empowering them prevent HIV.	participants commended MRC for the vaccine and they were positive about it as well as willing to participate.		what happens if he misses his PrEP? I use to travel to Kasese (western Uganda), will I be compensated my transport when I come to attend to my routine visits since Kasese is not the place where I was recruited from?
Older women (35+ years)	unprotected sex, accidents, sharing of sharp objects, mother-to-child transmission (breast feeding), kissing, rape. Women also attributed spread to their love for money which results in uprotected sex and the untreated STIs which accelerates spread.	use of condoms, timely treatment of STIs especially in women, PrEP, HIV testing and being faithfull. All the women agreed that men dislike condoms and almost half of the participants reported consistent condom use.	one noted that if a person in on a ART for a long time e.g 5 years, they get a negative test result if they test for HIV	participants had all known about PrEP from the clinic	all the participants received referrals for PrEP but only 3 had started PrEP by the time of the interview. They gave reasons like dislike for pills, and one participant said that it puts her on pressure knowing that she has pills to swallow. - felt it could cause misunderstandings within relationships (p	Most of the women did not agree to discose to their partners claiming that men are not understanding but would rather think it's ARV and take them for cheats. They suggested that health workers needs to talk to the men because they still do not agree to HCT, -it would be better for partner not to know (p8), some said they do not trust partners	one of the participant on PrEP got it from Kalisizo (RHSP) first through a friend but she later reached the facility, the other 2 participants got it from TASO Masaka	One participant was using PrEP said that PrEP improved her immunity against illnesses cough and flue. Women noted that they should talk their partners into taking PrEP and those who cannot manage may involve a health worker. Men should be given health talks as they tend to be hard.	Lack of transport, fear for side effects, dislike for pills, laziness	women are at risk for reasons like; the love for money, men do not want condoms, rape, men use force and burst condoms, and delayed STI treatment. Young boys 18-24 were also said to be at risk as old women merciliessly infect them. Prisoners and prison officerswho engage in anal sex. fisher folk as well as men 45-50 who sleep with young girls who never test.	they liked the procedures especially the routine testing for HIV which enabled them to know thier status. I get the test results, information on PrEP, I also get counselling on staying HIV negative, they ask if I have any STD or any other health problem and if I have, I go to the doctor, then to the pharmacy"	participants like the routine HIV testing since they engage with several men. However, they were concerned that they were not given HIV test result slips.	they were attracted by the routine HIV testing given that they are risk of HIV. Also attracted by other benefits like medical care and transport refund		almost half of the participants thought that the study is just giving them information (HCT and preventive measures) to prevent HIV. Some participants thought that the vaccine is an alternative of PrEP and only one participant knew that the vaccine to come is to prevent HIV although not on trial. one thought the study is introducing an HIV drug.	Some participants were worried that the vaccine would cause side effects, fears that participants were to be exposed to the virus, and the requirement of using family planning in the study as some women. However, others were loking up to the vaccine to save them from HIV	one participant was willing to pass on the vaccine message to other people and she testified to have introduced two women to PrEP already.	People talk a lot even out there that MRC does not give a result slip/card. Can I come back if I get problems from PrEP?. Is it true that they will first inject us with the virus? She added that she was hoping to relocate to their new house, will she be discontinued if she moves?
